# Supplementary material for: Association between full monitoring of biomedical and lifestyle target indicators and HbA1c level in primary type 2 diabetes care: an observational cohort study (ELZHA-cohort 1)
Source: PubMed Central journal article supplement — BMJ Open. 2019 Mar 13;9(3):e027208. doi: 10.1136/bmjopen-2018-027208 (PMC6429872; doi:10.1136/bmjopen-2018-027208), 2019-03-13
Supplement: bmjopen-2018-027208.draft_revisions.pdf [file bmjopen-2018-027208.draft_revisions.pdf]

# BMJ Open

BMJ Open is committed to open peer review. As part of this commitment we make the peer review history of every article we publish publicly available.

When an article is published we post the peer reviewers' comments and the authors' responses online. We also post the versions of the paper that were used during peer review. These are the versions that the peer review comments apply to.

The versions of the paper that follow are the versions that were submitted during the peer review process. They are not the versions of record or the final published versions. They should not be cited or distributed as the published version of this manuscript.

BMJ Open is an open access journal and the full, final, typeset and author-corrected version of record of the manuscript is available on our site with no access controls, subscription charges or pay-per-view fees (<http://bmjopen.bmj.com>).

If you have any questions on BMJ Open's open peer review process please email [info.bmjopen@bmj.com](mailto:info.bmjopen@bmj.com)

# BMJ Open

## Association between full monitoring of physiological and lifestyle target indicators and HbA1c level in primary type 2 diabetes care: an observational cohort study (ELZHA-cohort 1)

|                               |                                                                                                                                                                                                                                                                                                                                                                                                                                                     |
|-------------------------------|-----------------------------------------------------------------------------------------------------------------------------------------------------------------------------------------------------------------------------------------------------------------------------------------------------------------------------------------------------------------------------------------------------------------------------------------------------|
| Journal:                      | <i>BMJ Open</i>                                                                                                                                                                                                                                                                                                                                                                                                                                     |
| Manuscript ID                 | bmjopen-2018-027208                                                                                                                                                                                                                                                                                                                                                                                                                                 |
| Article Type:                 | Research                                                                                                                                                                                                                                                                                                                                                                                                                                            |
| Date Submitted by the Author: | 10-Oct-2018                                                                                                                                                                                                                                                                                                                                                                                                                                         |
| Complete List of Authors:     | van Bruggen, Sytske; Leiden University Medical Center, Public Health and Primary Care; Eerstelijns Zorggroep Haaglanden, Rauh, Simone<br>Kasteleyn, Marise; LUMC<br>Bonten, Tobias N.; Leids Universitair Medisch Centrum, Public Health and primary Care<br>Chavannes, Niels; Leiden University Medical Center, Public Health and Primary Care<br>Numans, Mattijs; Leiden University Medical Centre, 4Department of Public Health and Primary Care |
| Keywords:                     | General diabetes < DIABETES & ENDOCRINOLOGY, Quality in health care < HEALTH SERVICES ADMINISTRATION & MANAGEMENT, PRIMARY CARE                                                                                                                                                                                                                                                                                                                     |
|                               |                                                                                                                                                                                                                                                                                                                                                                                                                                                     |

SCHOLARONE™  
Manuscripts

Only

1  
2  
3 **Association between full monitoring of physiological and**  
4 **lifestyle target indicators and HbA1c level in primary type 2**  
5 **diabetes care: an observational cohort study (ELZHA-cohort 1)**  
6  
7  
8  
9

10 **Sytske van Bruggen**<sup>1,2</sup>, **Simone P Rauh**<sup>3</sup>, **Marise J Kasteleyn**<sup>1</sup>, **Tobias N**  
11 **Bonten**,<sup>1</sup> **Niels H Chavannes**,<sup>1</sup> **Mattijs E Numans**,<sup>1</sup>  
12  
13  
14  
15

- 16 1) Department of Public Health and Primary Care, Leiden University Medical Centre,  
17 Leiden, The Netherlands  
18  
19  
20  
21 2) Eerstelijns Zorggroep Haaglanden (ELZHA), The Hague, The Netherlands  
22  
23  
24 3) Department of Epidemiology and Biostatistics, Amsterdam Public Health Research  
25 Institute, VU University Medical Centre, Amsterdam, The Netherlands  
26  
27  
28  
29  
30

31 *Corresponding author: Sytske van Bruggen, [s.van\\_bruggen@lumc.nl](mailto:s.van_bruggen@lumc.nl)*  
32  
33

34 Leiden University Medical Centre  
35

36  
37 Afdeling Public Health en Eerstelijns geneeskunde (PHEG), kamer V6.26  
38

39  
40 Postbus 9600  
41

42  
43 2300 RC Leiden  
44

45  
46 Tel. +31 (0) 71 – 526 84 34  
47

48  
49 Manuscript: 2.460 words  
50  
51  
52  
53  
54  
55  
56  
57  
58  
59  
60

## Abstract

### Objective

Management of type 2 diabetes mellitus (T2DM) requires frequent patient monitoring. Within a collective care group setting, doubts on the clinical effects of registration are a barrier for full adoption of T2DM registration in general practice. We explored whether full monitoring of physiological and lifestyle-related target indicators within a care group approach is associated with lower HbA<sub>1c</sub> levels.

**Design** Observational, real-life cohort study

**Setting** Primary care data registry from the EerstelijnsZorggroepHaaglanden care group.

**Exposure** The care group provides general practitioners collectively with organisational support to facilitate structured T2DM primary care. Patients are offered quarterly medical and lifestyle-related consultation.

**Main outcome measure** Full monitoring of each target indicator in patients with T2DM, which includes minimally one measure of HbA<sub>1c</sub> level, systolic blood pressure, LDL, BMI, smoking behaviour and physical exercise between January and December 2014; otherwise, patients were defined as 'incompletely monitored'. HbA<sub>1c</sub> levels of 8,137 fully-monitored and 3,958 incompletely-monitored patients were compared, adjusted for the confounders diabetes duration, age and gender. Since recommended HbA<sub>1c</sub> values depend on age, medication use and diabetes duration, analyses were stratified into three HbA<sub>1c</sub> profile groups. Linear multilevel analyses enabled adjustment for general practice.

**Results** Compared to incompletely-monitored patients, fully-monitored patients had significantly lower HbA<sub>1c</sub> levels [95%CI] in the first (-2.03 [-2.53;-1.52]mmol/mol) (-0.19% [-0.23%;-0.14%]), second (-3.36 [-5.28;-1.43]mmol/mol) (-0.31% [-0.48%;-0.13%]) and third HbA<sub>1c</sub> profile group (-1.89 [-3.76;-0.01]mmol/mol) (-0.17% [-0.34%;0.00%]).

1  
2  
3 **Conclusions/interpretation** This study shows that in a care group setting, fully-  
4  
5 monitored patients had significantly lower HbA<sub>1c</sub> levels compared with incompletely-  
6  
7 monitored patients. Since this difference might have considerable clinical impact in terms  
8  
9 of T2DM-related risks, this might help general practices in care group settings to  
10  
11 overcome barriers on adequate registration and thus improve structured T2DM primary  
12  
13 care. From population health management perspective, we recommend a systematic  
14  
15 approach to adjust the structured care protocol for incompletely-monitored subgroups.  
16  
17

### 18 19 **Strengths and limitations of this study**

- 20  
21 - The observational real-life design of this study prevented any interference with  
22  
23 daily routines of GP practices, thus contributing to good reliability and  
24  
25 representativeness of our findings  
26  
27
- 28 - Because the availability of patient data on age, medication use and diabetes  
29  
30 duration allowed to conduct our analyses - in correspondence with professional  
31  
32 GP guidelines - for specific HbA<sub>1c</sub> threshold groups, the findings are relevant and  
33  
34 useful for clinical practice  
35
- 36 - Taking into consideration that a missing registration does not necessarily reflect a  
37  
38 lack of care, but might be caused by technical or practical problems instead, the  
39  
40 associations found in this study might be underestimated.  
41  
42  
43  
44  
45  
46  
47  
48  
49  
50  
51  
52  
53  
54  
55  
56  
57

## 1. Introduction

Type 2 diabetes is a typical lifestyle-related disease [1]. The course of type 2 diabetes and potential complications are influenced by smoking behavior [2, 3], BMI [4] and physical exercise [5]. Adopting a healthier lifestyle, e.g. by smoking cessation or weight loss, is known to be very demanding for individual patients [6, 7]. It has been established that attention for non-conscious motivational factors affecting an individual's behavior is important to realise sustained behavioral change [8]. In addition, to avoid relapse [9, 10] and maintain long-term behavioral change, follow-up support for lifestyle-related themes is recommended [11, 12]. Accordingly, guidelines for general practitioners (GPs) emphasize to monitor not only HbA<sub>1c</sub> levels, but also the physiological target indicators systolic blood pressure and LDL, as well as lifestyle-related indicators [13, 14].

However, for an average GP, providing structured primary diabetes care with sufficient attention for both physiological monitoring and lifestyle adaptation [15] is known to be challenging [16]. Therefore, in many Western countries, varying from the US and Europe [17, 18] to New-Zealand [19], an increasing number of GPs has delegated the regular structured primary diabetes care to nurse practitioners.

It is known that implementing structured primary diabetes care and delegation of tasks to a nurse practitioner has considerable impact on the organization of the GP practice [20, 21]. For example, in the USA, an evaluation of the recent Comprehensive Primary Care (CPC) program revealed a need to refine practice workflows, to incorporate new staff roles, and to overcome incompatibility of health technology systems [22]. In the Netherlands, most GPs have joined together in local 'care groups' [23] that provide logistic and quality support to individual GP practices. In addition, collective structured diabetes care protocols are negotiated with local health insurance companies. The agreements between care groups and health insurance companies on structured diabetes care protocols enable GPs to offer high-quality intensive primary diabetes care. To illustrate, on an annual basis, four

1  
2  
3 consultations at the GP practice with an explicit focus on lifestyle support are facilitated, as  
4 well as paramedical diabetes care (e.g. annual screening of fundus and feet); participation is  
5 free of charge for patients. It is known that providing a structured diabetes care protocol is  
6 associated with better monitoring of patients [24]. In addition, adequate registration of the  
7 diabetes-related patient health indicators is associated with improvement of the care process  
8 [25].  
9  
10  
11  
12  
13  
14

15 According to a recent study, care group participation is associated with improvement of the  
16 proportion patients with full monitoring of physiological and life style related target indicators  
17 [26]. However, a review on chronic care programs in primary care reported that doubts  
18 among care providers on the clinical effects of an intervention are a barrier for adoption [27].  
19 To our knowledge little is known about the relationship between full monitoring of  
20 physiological as well as lifestyle related target diabetes indicators in a care group setting and  
21 clinical health outcomes. The HbA<sub>1c</sub> level is established as a key diabetes health indicator  
22 [28]. Therefore, this study aims to investigate the association between full monitoring of  
23 physiological and lifestyle-related diabetes target indicators and HbA<sub>1c</sub> level, in patients with  
24 type 2 diabetes who receive a TYPE structured diabetes care protocol, facilitated by a care  
25 group.  
26  
27  
28  
29  
30  
31  
32  
33  
34  
35  
36  
37  
38  
39  
40  
41  
42  
43  
44  
45  
46  
47  
48  
49  
50  
51  
52  
53  
54  
55  
56  
57  
58  
59  
60

## 2. Research design and methods

### 2.1 Study design and population

Data were used of type 2 diabetes patients from the observational Eerstelijns Zorggroep Haaglanden (ELZHA) cohort, which is based on primary care registry data from a care group collective in the western part of the Netherlands. In January 2015, the care group numbered 168 GP practices (n=24,459 patients with type 2 diabetes ). On a periodic basis, GP members share an overview of their patient monitoring data with the care group. In February 2017, all GP practices were informed in writing and, based on an opt-out procedure, were invited to participate in this cohort. For the present study, pseudonymized data on monitoring of diabetes target indicators and HbA<sub>1c</sub> levels from patients were used from the calendar year 2014. Patients receiving continuously structured primary diabetes care from January 2014 through December 2014 were included. At least one registration of HbA<sub>1c</sub> in 2014 was necessary for inclusion. Since systolic blood pressure and LDL guidelines are specified for patients aged ≤80 years, patients aged ≥80 years were excluded. Patients were also excluded in case of missing data on age, gender or disease duration. Finally, because missing data on medication use were partly caused by technical problems, patients without registration of medication prescription were also excluded.

### 2.2 Exposure

Details of the ELZHA cohort study have been described previously (Van Bruggen et al., submitted). In short, within a care group setting, the structured primary care protocol includes a quarterly diabetes consultation, in which diabetes-related target indicators are checked and lifestyle education is provided, combined with 'paramedical' care such as an annual foot check, fundus screening and dietician's counseling. To facilitate the organization and quality control of this protocol, GP practices receive practical and logistic support,



1  
2  
3 including a computerized system to improve the care process and outcomes. Measurement  
4 of the diabetes target indicators (HbA<sub>1c</sub> level, systolic blood pressure, LDL level, BMI,  
5 smoking behaviour and physical exercise) took place in 2014 at the end of each quarter. In  
6 the present study, patients were regarded as 'fully monitored' when at least one measure of  
7 each of the target indicators was registered between January and December 2014. If one or  
8 more target indicators were not registered, patients were defined as 'incompletely  
9 monitored'.

### 20 2.3 Outcomes

21  
22 The outcome of this study was HbA<sub>1c</sub> level; this was computed in two steps. First, for each  
23 quarter, a mean HbA<sub>1c</sub> value was calculated based on all available HbA<sub>1c</sub> measures in that  
24 quarter. Based on the mean HbA<sub>1c</sub> levels of all quarters, a mean was computed for the  
25 whole calendar year. HbA<sub>1c</sub> level is presented in % and mmol/mol.

### 34 2.4 Analysis

35  
36 For patient characteristics, categorical variables were reported as numbers and  
37 percentages. Continuous variables were reported as means with standard deviation (SD) or,  
38 when non-normally distributed, as medians with interquartile ranges (IQR). Linear multilevel  
39 analyses were conducted to compare HbA<sub>1c</sub> levels of fully-monitored and incompletely-  
40 monitored patients. Multilevel analyses allowed to adjust the individual observations (level 1)  
41 for GP practice (level 2). In addition, the analyses were adjusted for patient age, duration of  
42 diabetes and gender, which are relevant possible confounders with regard to HbA<sub>1c</sub>  
43 outcomes.

44 Tailored on specific key patient characteristics (age, intensity of medication treatment, and  
45 disease duration) professional GP guidelines distinguish three patient profile groups for  
46  
47  
48  
49  
50  
51  
52

HbA<sub>1c</sub> targets [13]: **1**) for patients aged <70 years, and for older patients with a mild treatment regime (only metformin monotherapy prescription or lifestyle coaching), a target HbA<sub>1c</sub> value of 7.0% (53 mmol/mol) is recommended. In the present study, since missing data on medication might reflect administrative omissions rather than absence of medication treatment, patients without data on medication were excluded; **2**) for patients aged ≥70 years who need more intensive treatment and were diagnosed with diabetes <10 years previously, a target HbA<sub>1c</sub> value of 7.5% (58 mmol/mol) is recommended; **3**) for patients aged ≥70 years who need more intensive treatment and were diagnosed with diabetes ≥10 years previously, a target HbA<sub>1c</sub> value of 8.0% (64 mmol/mol) is recommended.

In view of the relevance for clinical practice, separate analyses were conducted and reported for each of these HbA<sub>1c</sub> profile groups. In addition, we tested for a significant interaction effect between monitoring completeness and HbA<sub>1c</sub> profile group. A p-value <0.05 was considered statistically significant; for interaction, a p-value <0.1 was considered statistically significant.

Descriptive statistics were analysed using SPSS, version 24.0. Multilevel analyses were performed using ML WiN (Version 2.28).

## 2.5 Patient and public involvement

Since this study was targeted on a GP supporting approach of structured primary diabetes care, patients were not actively involved.

## 2.6 Ethical considerations

Since the pseudonymized patient data contained only age and gender, the data could be aggregated without enabling investigators to identify individual patients. Due to the high number of patients, informed consent of individual patients was not required.

The study protocol was approved by the Medical Ethical Committee of the Leiden University Medical Center (code G16.102/SH/sh).

### 3. Results

This study included 167 GP practices (99%) with a total of 24,198 patients with type 2 diabetes ; of these, 12,095 patients met the inclusion criteria (for a detailed flowchart of inclusion see Figure 1). By definition, in this population HbA<sub>1c</sub> was always monitored, as not having an HbA<sub>1c</sub> measure available was an exclusion criterion for the present study. Of patients who were incompletely monitored, information on physical exercise was most often missing, followed by smoking, BMI, LDL, and systolic blood pressure (Figure 2).

Characteristics of our study population, classified by HbA<sub>1c</sub> profile and monitoring completeness, are presented in Table 1. Compared to incompletely-monitored patients, fully-monitored patients had lower mean HbA<sub>1c</sub> levels in all three HbA<sub>1c</sub> profiles. In addition, fully-monitored patients had a longer duration of diabetes than incompletely-monitored patients.

The crude analysis showed that, compared with incompletely-monitored patients, the mean HbA<sub>1c</sub> of fully-monitored patients was significantly lower in the first profile (-1.95 [95% CI -2.41; -1.49] mmol/mol) (-0.18% [-0.22%; -0.14%]), second profile (-2.03 [95 % CI -3.41;-0.66] mmol/mol) (-0.19% [-0.31%; -0.06%]) and third profile (-1.53 [95 % CI -2.96;-0.10] mmol/mol) (-0.14% [-0.27%; -0.01%]) (Table 2). Multilevel analyses with adjustment for diabetes duration, age and gender revealed similar significant associations in the first (-2.03 [95 % CI -2.53; -1.52] mmol/mol) (-0.19% (-0.23%; -0.14%)), second (-3.36 [95 % CI -5.28; -1.43] mmol/mol) (-0.31% [-0.48%; -0.13%]) and third profile (-1.89 [95 % CI -3.76; -0.01] mmol/mol) (-0.17% [-0.34%; 0.00%]). The magnitude of these associations did not significantly differ between the HbA<sub>1c</sub> profile groups (p=0.44 and p=0.35 for the second and third profile, respectively, compared with the first profile).

## 4. Discussion

This study explored whether monitoring completeness of physiological and lifestyle-related diabetes target indicators in a care group setting is associated with HbA<sub>1c</sub> level. In all HbA<sub>1c</sub> profile groups – defined based on patient age, intensity of medication treatment and disease duration – we found that fully-monitored patients had lower HbA<sub>1c</sub> levels than incompletely-monitored patients; the differences ranged from 0.17% (1.89 mmol/mol) to 0.31% (3.36 mmol/mol), indicating that adequate diabetes monitoring of physiological and lifestyle indicators in primary care is associated with better HbA<sub>1c</sub> levels. To our knowledge, this is the first study to analyse the association between systematic diabetes monitoring in primary care and HbA<sub>1c</sub> levels. Apart from one longitudinal Dutch study on structured primary diabetes care in a care group setting which reported a sharp decrease in the proportion of patients with a HbA<sub>1c</sub> level  $\geq 53$  mmol/mol [24], research on absolute HbA<sub>1c</sub> differences is scarce and findings appear to be somewhat inconsistent [29-32]. Therefore, caution is required when comparing our findings with any earlier studies. However, for each 1% (10.9 mmol/mol) reduction in mean HbA<sub>1c</sub>, a significant decrease in health risk has been reported, ranging from 21% for any endpoint related to diabetes including deaths, to 14% for myocardial infarction, and 37% for microvascular complications [33]. Further, our finding that registration of physical exercise was most often lacking, is in line with an earlier small-size study in which only 19% of patients with type 2 diabetes reported 'being guided properly' with regard to physical exercise [34].

Our finding that, compared with incomplete monitoring, full monitoring of patients is associated with a lower HbA<sub>1c</sub> level might be explained by continuity of care in several ways. First, if patients are monitored at least once a year, an increasing HbA<sub>1c</sub> level might be noticed at an early stage, resulting in fast and adequate treatment. Second, periodic monitoring and coaching of patients with regard to weight loss, smoking cessation and physical exercise contributes to enduring lifestyle adaptation [11, 12], which may lead to lower HbA<sub>1c</sub> levels [35].

1  
2  
3 Since fully-monitored patients with type 2 diabetes have significantly lower HbA<sub>1c</sub> levels, their  
4 risk for any diabetes-related health complication is lower compared to incompletely-  
5 monitored patients. Thus, in general, incomplete monitoring of a patient should be  
6 interpreted as an important sign of diabetes-related health risks. As reported by others [36],  
7 a tailored approach based on data registry and adjusted to patient characteristics (e.g.  
8 monitoring completeness), is recommended. This might help GP's to overcome barriers on  
9 full adoption of the care group monitoring approach. In addition, the present findings might  
10 be relevant for other structured diabetes primary care settings which focus on frequent  
11 monitoring and adequate registration of diabetes-related health outcomes, such as the  
12 Comprehensive Primary Care Plus program in the USA [37].  
13  
14  
15  
16  
17  
18  
19  
20  
21  
22

23 The present study is characterised by several strengths. First, in our view, an important  
24 strength of this study is the design: although randomized clinical trials might help to eliminate  
25 bias, adequate powering and generalizability are familiar problems [38], whereas  
26 observational studies allow to include large study populations. For example, in this study, all  
27 patients participating in a structured primary diabetes care program were enrolled, thereby  
28 contributing to high representativeness of our study population. Second, generally, since our  
29 study design did not interfere with the daily routine of GP practices, we assume adequate  
30 reliability of our findings. Thus, the observational real-life setting in our study reflects the  
31 reality of diabetes monitoring and HbA<sub>1c</sub> levels in primary care. Our design is in line with  
32 other studies that also used a pragmatic approach to conduct diabetes related studies in  
33 primary care [39-41]. Third, patients were included if they participated for at least one year,  
34 which contributes to the stability and, thus, the validity of our findings. Finally, conducting  
35 separate analyses for each HbA<sub>1c</sub> profile group allowed adjustment for the variety in the  
36 recommended HbA<sub>1c</sub> target values.  
37  
38  
39  
40  
41  
42  
43  
44  
45  
46  
47  
48  
49  
50

51 Nevertheless, this study is also subject to some limitations that need to be mentioned. First,  
52 since no control group was included, no causal relation between monitoring completeness  
53 and HbA<sub>1c</sub> level can be proven. Second, a missing registration does not necessarily mean  
54  
55  
56  
57

1  
2  
3 that the care has not been provided. For example, missings might be caused by technical  
4 problems, or lack of time for registration. Patients being considered erroneously as  
5 'incompletely monitored' might have underestimated the associations found, although we did  
6 correct our analyses for age, diabetes duration, gender and GP practice.  
7  
8  
9

10  
11 For future research, it might be useful to analyse the context of diabetes target monitoring  
12 and explore whether the association that we found reflects a causal relationship between  
13 monitoring completeness and HbA<sub>1c</sub> level. In addition, from the GP perspective, examining  
14 potential barriers to complete monitoring might provide keys to improvement of the  
15 monitoring process. To ameliorate the primary diabetes care of incompletely-monitored  
16 patients, exploration of their preferences and needs is suggested. In addition, an evaluation  
17 of financial costs and benefits of this care approach is recommended.  
18  
19  
20  
21  
22  
23  
24  
25

26 To summarize, in patients with type 2 diabetes within a care group setting, full monitoring of  
27 physiological and lifestyle target indicators is associated with lower HbA<sub>1c</sub> levels compared  
28 with incomplete monitoring. These differences might be expected to have a considerable  
29 clinical impact in terms of diabetes-related risks. We recommend a systematic approach to  
30 analyzing the needs of incompletely-monitored patient groups, and to adjust the structured  
31 care protocol for these subgroups in terms of population health management.  
32  
33  
34  
35  
36  
37  
38  
39  
40  
41  
42  
43  
44  
45  
46  
47  
48  
49  
50  
51  
52  
53  
54  
55  
56  
57  
58  
59  
60

## Article Information

**Acknowledgments.** The authors thank the family physicians and patients of the ELZHA care group for the use of their data for this study.

**Funding statement.** This research received no specific grant from any funding agency in the public, commercial or not-for-profit sectors.

**Duality of Interest.** No potential conflicts of interest relevant to this article were reported. All authors have completed the ICMJE uniform disclosure form at [www.icmje.org/coi\\_disclosure.pdf](http://www.icmje.org/coi_disclosure.pdf) and declare: no support from any organisation for the submitted work; no financial relationships with any organisations that might have an interest in the submitted work in the previous three years; no other relationships or activities that could appear to have influenced the submitted work.”

### Transparency Declaration

The lead author (the manuscript’s guarantor) affirms that the manuscript is an honest, accurate, and transparent account of the study being reported; that no important aspects of the study have been omitted; and that any discrepancies from the study as planned (and, if relevant, registered) have been explained.

**Author Contributions.** SvB analysed data and wrote the manuscript. SR analysed data and reviewed the manuscript. MK reviewed and edited the manuscript. TB reviewed the manuscript. NC reviewed the manuscript and contributed to the discussion. MN is the guarantor of this work and, as such, had full access to all the data in the study and takes responsibility for the integrity of the data and the accuracy of the data analysis.

**Data sharing statement.** The data that support the findings of this study are available from the corresponding author on request.

### Licence

1  
2  
3 The Corresponding Author has the right to grant on behalf of all authors and does grant on  
4 behalf of all authors, an exclusive licence (or non exclusive for government employees) on a  
5 worldwide basis to the BMJ Publishing Group Ltd (“BMJ”), and its Licencees to permit this  
6 article (if accepted) to be published in The BMJ’s editions and any other BMJ products and  
7 to exploit all subsidiary rights, as set out in *our licence*.” “  
8  
9  
10  
11  
12  
13  
14  
15  
16  
17  
18  
19  
20  
21  
22  
23  
24  
25  
26  
27  
28  
29  
30  
31  
32  
33  
34  
35  
36  
37  
38  
39  
40  
41  
42  
43  
44  
45  
46  
47  
48  
49  
50  
51  
52  
53  
54  
55  
56  
57  
58  
59  
60

For peer review only



## References

- [1] Howells L, Musaddaq B, McKay AJ, Majeed A (2016) Clinical impact of lifestyle interventions for the prevention of diabetes: an overview of systematic reviews. *BMJ Open* 6: e013806
- [2] Fagard RH (2009) Smoking amplifies cardiovascular risk in patients with hypertension and diabetes. *Diabetes Care* 32 Suppl 2: S429-431
- [3] Qin R, Chen T, Lou Q, Yu D (2013) Excess risk of mortality and cardiovascular events associated with smoking among patients with diabetes: meta-analysis of observational prospective studies. *Int J Cardiol* 167: 342-350
- [4] Gray N, Picone G, Sloan F, Yashkin A (2015) Relation between BMI and diabetes mellitus and its complications among US older adults. *South Med J* 108: 29-36
- [5] Dempsey PC, Blankenship JM, Larsen RN, et al. (2017) Interrupting prolonged sitting in type 2 diabetes: nocturnal persistence of improved glycaemic control. *Diabetologia* 60: 499-507
- [6] Babb S, Malarcher A, Schauer G, Asman K, Jamal A (2017) Quitting Smoking Among Adults - United States, 2000-2015. *MMWR Morb Mortal Wkly Rep* 65: 1457-1464
- [7] Twyman L, Bonevski B, Paul C, Bryant J (2014) Perceived barriers to smoking cessation in selected vulnerable groups: a systematic review of the qualitative and quantitative literature. *BMJ Open* 4: e006414
- [8] Papias EK (2016) Health goal priming as a situated intervention tool: how to benefit from nonconscious motivational routes to health behaviour. *Health Psychol Rev* 10: 408-424
- [9] Arterburn DE, Bogart A, Sherwood NE, et al. (2013) A multisite study of long-term remission and relapse of type 2 diabetes mellitus following gastric bypass. *Obes Surg* 23: 93-102
- [10] Hawkins J, Hollingworth W, Campbell R (2010) Long-term smoking relapse: a study using the british household panel survey. *Nicotine Tob Res* 12: 1228-1235
- [11] Pjanic, Muller R, Laimer M, Hagenbuch N, Laederach K, Stanga Z (2017) Evaluation of a multiprofessional, nonsurgical obesity treatment program: which parameters indicated life style changes and weight loss? *J Eat Disord* 5: 14
- [12] Venditti EM, Wylie-Rosett J, Delahanty LM, et al. (2014) Short and long-term lifestyle coaching approaches used to address diverse participant barriers to weight loss and physical activity adherence. *Int J Behav Nutr Phys Act* 11: 16
- [13] Rutten GEHM DGW, Nijpels G, Houweling ST, Van de Laar FA, Bilo HJ, Holleman F, Burgers JS, Wiersma Tj, Janssen PGH (2013) NHG-Standaard Diabetes mellitus type 2 (derde herziening). *Huisarts en Wetenschap* 56: 512-525
- [14] (NICE guideline 2015) Type 2 diabetes in adults: management. In. National Institute for Health and Care Excellence, United Kingdom
- [15] Ekong G, Kavookjian J (2016) Motivational interviewing and outcomes in adults with type 2 diabetes: A systematic review. *Patient Educ Couns* 99: 944-952
- [16] Rushforth B, McCrorie C, Glidewell L, Midgley E, Foy R (2016) Barriers to effective management of type 2 diabetes in primary care: qualitative systematic review. *Br J Gen Pract* 66: e114-127
- [17] Maier C, Aiken L., and Busse R. (2017) Nurses in advanced roles in primary care: Policy levers for implementation. In: *OECD Health Working Papers*, Paris
- [18] Mergenthal K, Beyer M, Gerlach FM, Guethlin C (2016) Sharing Responsibilities within the General Practice Team - A Cross-Sectional Study of Task Delegation in Germany. *PLoS One* 11: e0157248
- [19] Hefford M, Love T, Cumming J, Finlayson M, Raymont A (2011) The financial impact of clinical task substitution between practice nurses and GPs in New Zealand primary care centres. *N Z Med J* 124: 59-65
- [20] Ferrante JM, Shaw EK, Bayly JE, et al. (2018) Barriers and Facilitators to Expanding Roles of Medical Assistants in Patient-Centered Medical Homes (PCMHs). *J Am Board Fam Med* 31: 226-235

- 1  
2  
3 [21] McInnes S, Peters K, Bonney A, Halcomb E (2015) An integrative review of facilitators and  
4 barriers influencing collaboration and teamwork between general practitioners and nurses working  
5 in general practice. *J Adv Nurs* 71: 1973-1985
- 6 [22] Dale SB, Ghosh A, Peikes DN, et al. (2016) Two-Year Costs and Quality in the Comprehensive  
7 Primary Care Initiative. *N Engl J Med* 374: 2345-2356
- 8 [23] Struijs JN, Van Til JT, Baan CA (2009) Experimenteren met de keten-dbc diabetes: de eerste  
9 zichtbare effecten. RIVM, Bilthoven, pp 19-62
- 10 [24] Hendriks SH, van Hateren KJ, Groenier KH, et al. (2015) Sex Differences in the Quality of  
11 Diabetes Care in the Netherlands (ZODIAC-45). *PLoS One* 10: e0145907
- 12 [25] Hoque DME, Kumari V, Hoque M, Ruseckaite R, Romero L, Evans SM (2017) Impact of clinical  
13 registries on quality of patient care and clinical outcomes: A systematic review. *PLoS One* 12:  
14 e0183667
- 15 [26] Van Bruggen S, Kasteleyn MJ, Rauh SP, Bonten TN, Chavannes NH, Numans ME (2018) A  
16 multidisciplinary Type 2 Diabetes care protocol within a primary care group leads to a higher  
17 proportion of fully-monitored patients (ELZHA cohort-1). In: Annual Meeting. North American  
18 Primary Care Research Group, Chicago (Illinois), United States
- 19 [27] Kadu MK, Stolee P (2015) Facilitators and barriers of implementing the chronic care model in  
20 primary care: a systematic review. *BMC Fam Pract* 16: 12
- 21 [28] Lacey RE, Sacker A, Bell S, et al. (2017) Work-family life courses and BMI trajectories in three  
22 British birth cohorts. *Int J Obes (Lond)* 41: 332-339
- 23 [29] Fuchs S, Henschke C, Blumel M, Busse R (2014) Disease management programs for type 2  
24 diabetes in Germany: a systematic literature review evaluating effectiveness. *Dtsch Arztebl Int* 111:  
25 453-463
- 26 [30] Gabbay RA, Lendel I, Saleem TM, et al. (2006) Nurse case management improves blood  
27 pressure, emotional distress and diabetes complication screening. *Diabetes Res Clin Pract* 71: 28-35
- 28 [31] Kostev K, Rockel T, Jacob L (2017) Impact of Disease Management Programs on HbA1c  
29 Values in Type 2 Diabetes Patients in Germany. *J Diabetes Sci Technol* 11: 117-122
- 30 [32] Wiefarn S, Kostev K, Heumann C, Rettelbach A (2017) [Effect of the Disease Management  
31 Program on HbA1c Value in Type 2 Diabetes Mellitus Patients: A Retrospective Comparison between  
32 Disease Management Programs and Standard Care]. *Dtsch Med Wochenschr* 142: e148-e155
- 33 [33] Stratton IM, Adler AI, Neil HA, et al. (2000) Association of glycaemia with macrovascular and  
34 microvascular complications of type 2 diabetes (UKPDS 35): prospective observational study. *BMJ*  
35 321: 405-412
- 36 [34] Stuij M, Elling A, Abma TA (2017) Conflict between diabetes guidelines and experienced  
37 counselling in sports and physical activity. An exploratory study. *Eur J Public Health* 27: 157-159
- 38 [35] Umpierre D, Ribeiro PA, Kramer CK, et al. (2011) Physical activity advice only or structured  
39 exercise training and association with HbA1c levels in type 2 diabetes: a systematic review and meta-  
40 analysis. *JAMA* 305: 1790-1799
- 41 [36] Aronson R, Orzech N, Ye C, Brown RE, Goldenberg R, Brown V (2016) Specialist-Led Diabetes  
42 Registries and Prevalence of Poor Glycemic Control in Type 2 Diabetes: The Diabetes Registry  
43 Outcomes Project for A1C Reduction (DROP A1C). *Diabetes Care* 39: 1711-1717
- 44 [37] Sessums LL, McHugh SJ, Rajkumar R (2016) Medicare's Vision for Advanced Primary Care:  
45 New Directions for Care Delivery and Payment. *JAMA* 315: 2665-2666
- 46 [38] Frakt AB (2015) An observational study goes where randomized clinical trials have not. *JAMA*  
47 313: 1091-1092
- 48 [39] Hippisley-Cox J, Coupland C (2016) Diabetes treatments and risk of heart failure,  
49 cardiovascular disease, and all cause mortality: cohort study in primary care. *BMJ* 354: i3477
- 50 [40] Price DB, Russell R, Mares R, et al. (2016) Metabolic Effects Associated with ICS in Patients  
51 with COPD and Comorbid Type 2 Diabetes: A Historical Matched Cohort Study. *PLoS One* 11:  
52 e0162903
- 53  
54  
55  
56  
57  
58  
59  
60

1  
2  
3  
4  
5  
6  
7  
8  
9  
10  
11  
12  
13  
14  
15  
16  
17  
18  
19  
20  
21  
22  
23  
24  
25  
26  
27  
28  
29  
30  
31  
32  
33  
34  
35  
36  
37  
38  
39  
40  
41  
42  
43  
44  
45  
46  
47  
48  
49  
50  
51  
52  
53  
54  
55  
56  
57  
58  
59  
60

[41] Smits KPJ, Sidorenkov G, Navis G, et al. (2017) Prescribing Quality and Prediction of Clinical Outcomes in Patients With Type 2 Diabetes: A Prospective Cohort Study. *Diabetes Care* 40: e83-e84

For peer review only

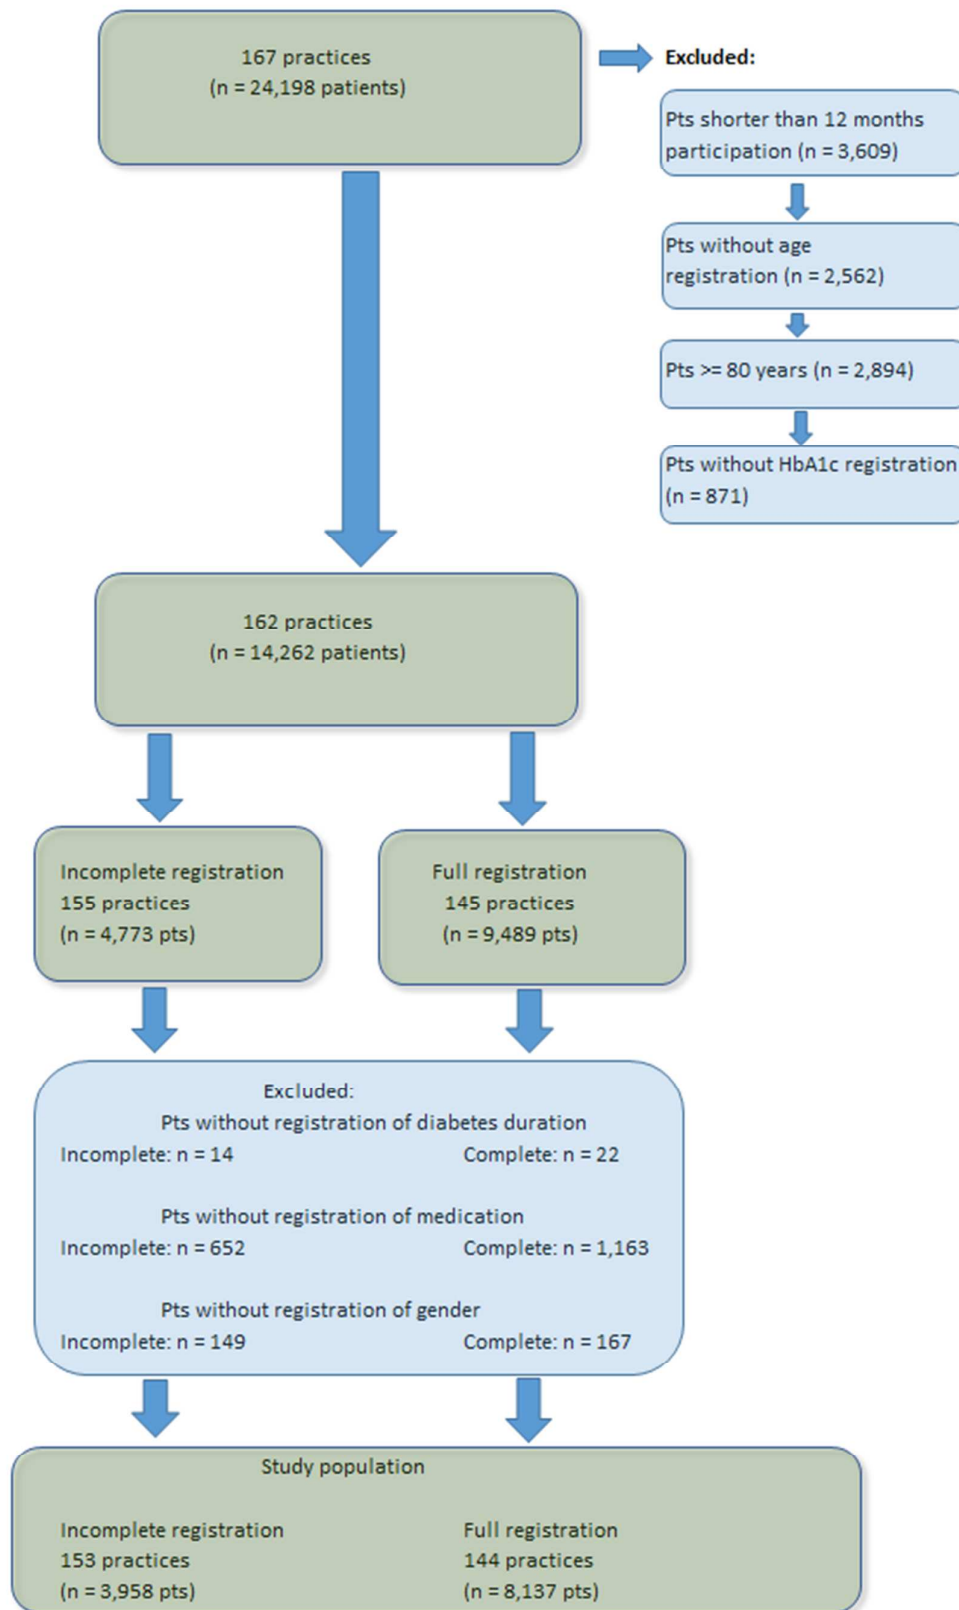

Figure 1. Flowchart of patient inclusion.  
*Pts = patients*

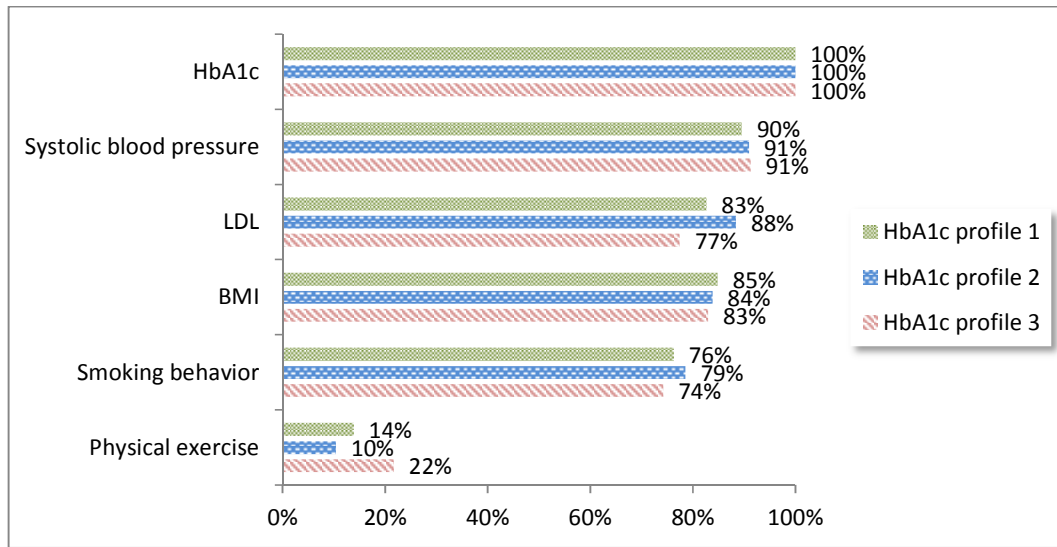

Figure 2. Overview of registered indicators in incompletely monitored patients within Hba1c profile HbA1c: Hemoglobin A1c

peer review only

Table 1. Characteristics of the study population: classified by HbA<sub>1c</sub> profile and monitoring completeness.

|                                                        |              | <b>HbA<sub>1c</sub> profile 1<sup>1</sup></b>          |                  | <b>HbA<sub>1c</sub> profile 2<sup>2</sup></b>          |                  | <b>HbA<sub>1c</sub> profile 3<sup>3</sup></b>   |                 |
|--------------------------------------------------------|--------------|--------------------------------------------------------|------------------|--------------------------------------------------------|------------------|-------------------------------------------------|-----------------|
|                                                        |              | <i>Target HbA<sub>1c</sub>:<br/>53 mmol/mol (7.0%)</i> |                  | <i>Target HbA<sub>1c</sub>:<br/>58 mmol/mol (7.5%)</i> |                  | <i>HbA<sub>1c</sub>: 64 mmol/mol<br/>(8.0%)</i> |                 |
|                                                        |              | <b>Incomplete</b>                                      | <b>Complete</b>  | <b>Incomplete</b>                                      | <b>Complete</b>  | <b>Incomplete</b>                               | <b>Complete</b> |
|                                                        |              | n =3,345                                               | n =6,794         | n = 396                                                | n = 656          | n = 217                                         | n = 687         |
| HbA <sub>1c</sub> level:<br>mean [SD]                  | mmol/<br>mol | 53.51<br>(12.31)                                       | 51.56<br>(10.51) | 55.91<br>(11.66)                                       | 53.87<br>(10.60) | 55.12<br>(10.57)                                | 53.60<br>(8.98) |
|                                                        | %            | 7.05 (1.13)                                            | 6.87 (0.96)      | 7.27 (1.07)                                            | 7.08 (0.97)      | 7.19 (0.97)                                     | 7.06 (0.82)     |
| Diabetes duration,<br>years: median [IQR] <sup>1</sup> |              | 3 [3 – 8]                                              | 7 [4 – 10]       | 3 [3 – 7]                                              | 7 [4 – 8]        | 13 [11 – 16]                                    | 13 [11 – 15]    |
| Age (years): median<br>[IQR] <sup>2</sup>              |              | 61 [54 – 67]                                           | 62 [55 – 68]     | 74 [72 – 76]                                           | 74 [71 – 76]     | 74 [72 – 77]                                    | 74 [72 – 76]    |
| Gender: % female (n)                                   |              | 44 (1,465)                                             | 46 (3,106)       | 46 (183)                                               | 45 (297)         | 51(110)                                         | 46 (316)        |

<sup>1</sup>) Profile 1: patients aged <70 years, and older patients with a mild treatment regime (only metformin monotherapy prescription)

<sup>2</sup>) Profile 2: patients aged ≥70 years who need more intensive treatment and diagnosed with diabetes <10 years ago

<sup>3</sup>) Profile 3: patients aged ≥70 years who need more intensive treatment and diagnosed with diabetes ≥10 years ago

Table 2. Multilevel analyses evaluating the HbA<sub>1c</sub> difference of fully-monitored patients compared to incompletely monitored patients.

|                          |                | <b>Profile 1</b> |               |                | <b>Profile 2</b> |               |                | <b>Profile 3</b> |               |                |
|--------------------------|----------------|------------------|---------------|----------------|------------------|---------------|----------------|------------------|---------------|----------------|
|                          |                | <b>B</b>         | <b>95% CI</b> | <b>p-value</b> | <b>B</b>         | <b>95% CI</b> | <b>p-value</b> | <b>B</b>         | <b>95% CI</b> | <b>p-value</b> |
| Model<br>1 <sup>a)</sup> | mmol/<br>/ mol | -1.95            | -2.41,-1.49   | <0.001         | -2.03            | -3.41, -0.66  | 0.004          | -1.53            | -2.96, -0.10  | 0.037          |
|                          | %              | -0.18            | -0.22; -0.14  |                | -0.19            | -0.31; -0.06  |                | -0.14            | -0.27; -0.01  |                |
| Model<br>2 <sup>b)</sup> | mmol/<br>/ mol | -2.03            | -2.53, -1.52  | <0.001         | -3.36            | -5.28, -1.43  | 0.001          | -1.89            | -3.76, -0.01  | 0.049          |
|                          | %              | -0.19            | -0.23; -0.14  |                | -0.31            | -0.48; -0.13  |                | -0.17            | -0.34; 0.00   |                |

<sup>a)</sup> Crude analysis

<sup>b)</sup> Multilevel analysis adjusted for age, diabetes duration and gender

# BMJ Open

## Association between full monitoring of biomedical and lifestyle target indicators and HbA1c level in primary type 2 diabetes care: an observational cohort study (ELZHA-cohort 1)

|                                 |                                                                                                                                                                                                                                                                                                                                                                                                                                                                                                  |
|---------------------------------|--------------------------------------------------------------------------------------------------------------------------------------------------------------------------------------------------------------------------------------------------------------------------------------------------------------------------------------------------------------------------------------------------------------------------------------------------------------------------------------------------|
| Journal:                        | <i>BMJ Open</i>                                                                                                                                                                                                                                                                                                                                                                                                                                                                                  |
| Manuscript ID                   | bmjopen-2018-027208.R1                                                                                                                                                                                                                                                                                                                                                                                                                                                                           |
| Article Type:                   | Research                                                                                                                                                                                                                                                                                                                                                                                                                                                                                         |
| Date Submitted by the Author:   | 04-Jan-2019                                                                                                                                                                                                                                                                                                                                                                                                                                                                                      |
| Complete List of Authors:       | van Bruggen, Sytske; Leiden University Medical Center, Public Health and Primary Care; Eerstelijns Zorggroep Haaglanden, Rauh, Simone<br>Kasteleyn, Marise; Leiden University Medical Center, Public Health and Primary Care<br>Bonten, Tobias N.; Leids Universitair Medisch Centrum, Public Health and primary Care<br>Chavannes, Niels; Leiden University Medical Center, Public Health and Primary Care<br>Numans, Mattijs; Leiden University Medical Centre, Public Health and Primary Care |
| <b>Primary Subject Heading</b>: | Diabetes and endocrinology                                                                                                                                                                                                                                                                                                                                                                                                                                                                       |
| Secondary Subject Heading:      | Epidemiology, General practice / Family practice, Health services research, Public health                                                                                                                                                                                                                                                                                                                                                                                                        |
| Keywords:                       | General diabetes < DIABETES & ENDOCRINOLOGY, Quality in health care < HEALTH SERVICES ADMINISTRATION & MANAGEMENT, PRIMARY CARE                                                                                                                                                                                                                                                                                                                                                                  |
|                                 |                                                                                                                                                                                                                                                                                                                                                                                                                                                                                                  |

SCHOLARONE™  
Manuscripts

1  
2  
3 **Association between full monitoring of biomedical and lifestyle**  
4 **target indicators and HbA1c level in primary type 2 diabetes**  
5 **care: an observational cohort study (ELZHA-cohort 1)**  
6  
7  
8  
9

10  
11 **Sytske van Bruggen<sup>1,2</sup>, Simone P Rauh<sup>3</sup>, Marise J Kasteleyn<sup>1</sup>, Tobias N Bonten<sup>1</sup>,**  
12 **Niels H Chavannes<sup>1</sup>, Mattijs E Numans<sup>1</sup>**  
13  
14  
15

- 16  
17 1) Department of Public Health and Primary Care, Leiden University Medical Centre,  
18 Leiden, The Netherlands  
19  
20  
21  
22 2) Eerstelijns Zorggroep Haaglanden (ELZHA), The Hague, The Netherlands  
23  
24  
25 3) Department of Epidemiology and Biostatistics, Amsterdam Public Health Research  
26 Institute, VU University Medical Centre, Amsterdam, The Netherlands  
27  
28  
29  
30  
31  
32

33 *Corresponding author: Sytske van Bruggen, [s.van\\_bruggen@lumc.nl](mailto:s.van_bruggen@lumc.nl)*  
34  
35

36 Leiden University Medical Centre  
37  
38

39 Afdeling Public Health en Eerstelijns geneeskunde (PHEG), kamer V6.26  
40  
41

42 Postbus 9600  
43  
44

45 2300 RC Leiden  
46  
47

48 Tel. +31 (0) 71 – 526 84 34  
49  
50

51 Manuscript: 2,925 words  
52  
53  
54  
55  
56  
57  
58  
59  
60



## Abstract

### Objective

Management of type 2 diabetes mellitus (T2DM) requires frequent patient monitoring. Within a collective care group setting, doubts on the clinical effects of registration are a barrier for full adoption of T2DM registration in general practice. We explored whether full monitoring of biomedical and lifestyle-related target indicators within a care group approach is associated with lower HbA<sub>1c</sub> levels.

**Design** Observational, real-life cohort study

**Setting** Primary care data registry from the EerstelijnsZorggroepHaaglanden care group.

**Exposure** The care group provides general practitioners collectively with organisational support to facilitate structured T2DM primary care. Patients are offered quarterly medical and lifestyle-related consultation.

**Main outcome measure** Full monitoring of each target indicator in patients with T2DM, which includes minimally one measure of HbA<sub>1c</sub> level, systolic blood pressure, LDL, BMI, smoking behaviour and physical exercise between January and December 2014; otherwise, patients were defined as 'incompletely monitored'. HbA<sub>1c</sub> levels of 8,137 fully-monitored and 3,958 incompletely-monitored patients were compared, adjusted for the confounders diabetes duration, age and gender. Since recommended HbA<sub>1c</sub> values depend on age, medication use and diabetes duration, analyses were stratified into three HbA<sub>1c</sub> profile groups. Linear multilevel analyses enabled adjustment for general practice.

**Results** Compared to incompletely-monitored patients, fully-monitored patients had significantly lower HbA<sub>1c</sub> levels [95%CI] in the first (-2.03 [-2.53;-1.52]mmol/mol) (-0.19% [-0.23%;-0.14%]), second (-3.36 [-5.28;-1.43]mmol/mol) (-0.31% [-0.48%;-0.13%]) and third HbA<sub>1c</sub> profile group (-1.89 [-3.76;-0.01]mmol/mol) (-0.17% [-0.34%;0.00%]).

1  
2  
3 **Conclusions/interpretation** This study shows that in a care group setting, fully-  
4  
5 monitored patients had significantly lower HbA<sub>1c</sub> levels compared with incompletely-  
6  
7 monitored patients. Since this difference might have considerable clinical impact in terms  
8  
9 of T2DM-related risks, this might help general practices in care group settings to  
10  
11 overcome barriers on adequate registration and thus improve structured T2DM primary  
12  
13 care. From population health management perspective, we recommend a systematic  
14  
15 approach to adjust the structured care protocol for incompletely-monitored subgroups.  
16  
17  
18  
19  
20

### 21 **Strengths and limitations of this study**

- 22  
23 - The observational real-life design of this study prevented any interference with  
24  
25 daily routines of GP practices, thus contributing to good reliability and  
26  
27 representativeness of our findings
- 28  
29 - Because the availability of patient data on age, medication use and diabetes  
30  
31 duration allowed to conduct our analyses - in correspondence with professional  
32  
33 GP guidelines - for specific HbA<sub>1c</sub> threshold groups, the findings are relevant and  
34  
35 useful for clinical practice
- 36  
37 - Taking into consideration that a missing registration does not necessarily reflect a  
38  
39 lack of care, but might be caused by technical or practical problems instead, the  
40  
41 associations found in this study might be underestimated.  
42  
43  
44  
45  
46  
47  
48  
49  
50  
51  
52  
53  
54  
55  
56  
57  
58  
59  
60

## 1. Introduction

Type 2 diabetes is a typical lifestyle-related disease (1). The course of type 2 diabetes and potential complications are influenced by smoking behaviour (2, 3), BMI (4) and physical exercise (5). Adopting a healthier lifestyle, e.g. by smoking cessation or weight loss, is known to be very demanding for individual patients (6, 7). It has been established that attention for non-conscious motivational factors affecting an individual's behaviour is important to realise sustained behavioural change (8). In addition, to avoid relapse (9, 10) and maintain long-term behavioural change, follow-up support for lifestyle-related themes is recommended (11, 12). Accordingly, in the Netherlands, a nationally acknowledged scientific council of general practitioners (GPs) has determined professional guidelines for diabetes primary care (13). In correspondence with the NICE guidelines (14), it is recommended to monitor at least once a year not only HbA<sub>1c</sub> levels, but also the biomedical target indicators systolic blood pressure and LDL, as well as lifestyle-related indicators.

However, for an average GP, providing structured primary diabetes care with sufficient attention for both biomedical monitoring and lifestyle adaptation (15) is reported to be challenging (16). Therefore, in many Western countries, varying from the US and Europe (17, 18) to New-Zealand (19), an increasing number of GPs has delegated the regular structured primary diabetes care to nurse practitioners.

It is known that implementing structured primary diabetes care and delegation of tasks to a nurse practitioner has considerable impact on the organization of the GP practice (20, 21). For example, in the USA, an evaluation of the recent Comprehensive Primary Care (CPC) program revealed a need to refine practice workflows, to incorporate new staff roles, and to overcome incompatibility of health technology systems (22). To improve the delivery of structured primary diabetes care in the Netherlands, most GPs have joined together in local 'care groups' (23). Care groups negotiate collective structured diabetes care protocols with the funding institutions of Dutch primary care, namely, local health insurance companies –.

1  
2  
3 For GPs, participation in a care group is voluntary. However, the logistic and quality support  
4 to individual GP practices which is part of the care group approach, might be seen as an  
5 incentive for care group participation. That is, the agreements between care groups and  
6 health insurance companies on structured diabetes care protocols enable GPs to offer high-  
7 quality intensive primary diabetes care. To illustrate, on an annual basis, four consultations  
8 at the GP practice with an explicit focus on lifestyle support are facilitated, as well as  
9 complementary allied health (e.g. annual screening of fundus and feet). All patients who  
10 receive diabetes care in GP practice are eligible for participation in the structured care  
11 protocol. It is known that providing a structured diabetes care protocol is associated with  
12 better monitoring of patients (24). In addition, adequate registration of the diabetes-related  
13 patient health indicators is associated with improvement of the care process (25). The costs  
14 of this protocol are fully covered by health insurance companies. For patients, participation is  
15 free of charge.

16  
17  
18 According to a recent study, care group participation is associated with improvement of the  
19 proportion patients with full monitoring of biomedical and life style related target indicators  
20 (26). However, a review on chronic care programs in primary care reported that doubts  
21 among care providers on the clinical effects of an intervention are a barrier for adoption (27).  
22 To our knowledge little is known about the relationship between full monitoring of biomedical  
23 as well as lifestyle related target diabetes indicators in a care group setting and clinical  
24 health outcomes. The HbA<sub>1c</sub> level is established as a key diabetes health indicator (28).  
25 Therefore, this study aims to investigate the association between full monitoring of  
26 biomedical and lifestyle-related diabetes target indicators and HbA<sub>1c</sub> level, in patients with  
27 type 2 diabetes who receive a structured diabetes care protocol, facilitated by a care group.

## 2. Research design and methods

## 2.1 Study design and population

Data were used of type 2 diabetes patients from the observational Eerstelijns Zorggroep Haaglanden (ELZHA) cohort, which is based on primary care registry data from a care group in the western part of the Netherlands. In January 2015, the care group numbered 168 GP practices (n=24,459 patients with type 2 diabetes). On a periodic basis, GP members share an overview of their patient monitoring data with the care group. In February 2017, all GP practices were informed in writing and, based on an opt-out procedure, were invited to participate in this cohort. For the present study, pseudonymized data on monitoring of diabetes target indicators and HbA<sub>1c</sub> levels from patients were used from the calendar year 2014. Patients receiving continuously structured primary diabetes care from January 2014 through December 2014 at the same GP practice were included. At least one registration of HbA<sub>1c</sub> in 2014 was necessary for inclusion. Since systolic blood pressure and LDL guidelines are specified for patients aged  $\leq 80$  years, patients aged  $\geq 80$  years were excluded. Patients were also excluded in case of missing data on age, gender or disease duration. Finally, because missing data on medication use were partly caused by technical problems, patients without registration of medication prescription were also excluded.

## 2.2 Exposure

Details of the ELZHA cohort study have been described previously (Van Bruggen et al., submitted). In short, within a care group setting, GPs are able to invite all their T2DM patients with primary care treatment for this structured care protocol. During a standard diabetes consultation or at time of diagnosis, patients are informed about this care protocol. Patients who provide consent to be enrolled, can join the structured primary care protocol. The protocol includes a quarterly diabetes consultation, in which diabetes-related target indicators are checked and lifestyle education is provided, combined with complementary allied health such as an annual foot check, fundus screening and dietician's counselling. To facilitate the organization and quality control of this protocol, GP practices receive practical and logistic support, including a computerized system to improve the care process and

1  
2  
3 outcomes. Measurement of the diabetes target indicators (HbA<sub>1c</sub> level, systolic blood  
4 pressure, LDL level, BMI, smoking behaviour and physical exercise) took place in 2014 at  
5 the end of each quarter. In the present study, patients were regarded as 'fully monitored'  
6 when each target indicator was registered at least once between January and December  
7 2014. If one or more target indicators were not registered minimally one time in calendar  
8 year 2014, patients were defined as 'incompletely monitored'.  
9  
10  
11  
12  
13  
14  
15  
16  
17  
18  
19

### 20 **2.3 Outcomes**

21  
22 The outcome of this study was HbA<sub>1c</sub> level; this was computed in two steps. First, for each  
23 quarter, a mean HbA<sub>1c</sub> value was calculated based on all available HbA<sub>1c</sub> measures in that  
24 quarter. Based on the mean HbA<sub>1c</sub> levels of all quarters, a mean was computed for the  
25 whole calendar year. HbA<sub>1c</sub> level is presented in % and mmol/mol.  
26  
27  
28  
29  
30  
31  
32  
33  
34

### 35 **2.4 Analysis**

36  
37 For patient characteristics, categorical variables were reported as numbers and  
38 percentages. Continuous variables were reported as means with standard deviation (SD) or,  
39 when non-normally distributed, as medians with interquartile ranges (IQR). Baseline  
40 characteristics of excluded patients were, if available, compared to the study population.  
41  
42 Linear multilevel analyses were conducted to compare HbA<sub>1c</sub> levels of fully-monitored and  
43 incompletely-monitored patients. Multilevel analyses allowed to adjust the individual  
44 observations (level 1) for GP practice (level 2). In addition, the analyses were adjusted for  
45 patient age, duration of diabetes and gender, which are relevant possible confounders with  
46 regard to HbA<sub>1c</sub> outcomes.  
47  
48  
49  
50  
51  
52  
53  
54  
55  
56

57 Tailored on specific key patient characteristics (age, intensity of medication treatment, and  
58 disease duration) professional Dutch GP guidelines recommend differentiated HbA<sub>1c</sub> targets  
59  
60

1  
2  
3 for three different patient profile groups based on age and prescribed medication. Details on  
4 the scientific determination of these target values are presented in the guidelines (13). To  
5 summarize, 1) for patients aged <70 years, and for older patients with a mild treatment  
6 regime (only metformin monotherapy prescription or lifestyle coaching), a target HbA1c  
7 value of 7.0% (53 mmol/mol) is recommended. 2) for patients aged ≥70 years who need  
8 more intensive treatment and were diagnosed with diabetes <10 years previously, a target  
9 HbA1c value of 7.5% (58 mmol/mol) is recommended; 3) for patients aged ≥70 years who  
10 need more intensive treatment and were diagnosed with diabetes ≥10 years previously, a  
11 target HbA1c value of 8.0% (64 mmol/mol) is recommended. In the present study, since  
12 missing data on medication might reflect administrative omissions rather than absence of  
13 medication treatment, patients without data on medication were excluded.

14  
15  
16 In view of the relevance for clinical practice, separate multi-level analyses were conducted  
17 and reported for each of these HbA<sub>1c</sub> profile groups. In addition, in a non-stratified multi-level  
18 analysis, we tested whether the magnitude of the effect found in HbA1c profile 2 and 3  
19 differed significantly from Hba1c profile 1. A p-value <0.05 was considered statistically  
20 significant; for interaction, a p-value <0.1 was considered statistically significant.

21  
22  
23 Descriptive statistics were analysed using SPSS, version 24.0. Multilevel analyses were  
24 performed using ML WiN (Version 2.28).

## 25 26 27 **2.5 Patient and public involvement**

28  
29  
30 Since this study was targeted on a GP supporting approach of structured primary diabetes  
31 care, patients were not actively involved.

## 32 33 34 **2.6 Ethical considerations**

35  
36  
37 Since the pseudonymized patient data contained only age and gender, the data could be  
38 aggregated without enabling investigators to identify individual patients. Due to the high  
39 number of patients, informed consent of individual patients was not required.

1  
2  
3  
4  
5  
6  
7  
8  
9  
10  
11  
12  
13  
14  
15  
16  
17  
18  
19  
20  
21  
22  
23  
24  
25  
26  
27  
28  
29  
30  
31  
32  
33  
34  
35  
36  
37  
38  
39  
40  
41  
42  
43  
44  
45  
46  
47  
48  
49  
50  
51  
52  
53  
54  
55  
56  
57  
58  
59  
60

The study protocol was approved by the Medical Ethical Committee of the Leiden University Medical Center (code G16.102/SH/sh).

For peer review only



### 3. Results

This study included 167 GP practices (99%) with a total of 24,198 patients with type 2 diabetes; of these, 12,095 patients met the inclusion criteria (for a detailed flowchart of inclusion see Figure 1). By definition, in this population HbA<sub>1c</sub> was always monitored, as not having an HbA<sub>1c</sub> measure available was an exclusion criterion for the present study.

Comparing characteristics of the excluded patients (n = 12,103 patients) with the study population (n = 12,095 patients, see supplementary file, table 1), in excluded patients, mean HbA<sub>1c</sub> level (50.32 mmol/mol, SD = 12.8 mmol/mol; 6.76 % (SD = 3.32 %, 7.535 registrations missing) was slightly lower than in the study population (52.5 mmol/mol, SD=1.07 mmol/mol; 6.95 %, SD = 3.16%). Comparing the median diabetes duration of excluded patients (5 years, IQR: 3 – 9, 63 registrations missing) to the study population (6 years, IQR: 3 – 10), no substantial differences were found. Regarding median age, excluded patients (71 years, IQR: 60 – 82, 2,917 registrations missing) were older than included patients (median: 64 years, IQR: 56 – 71 years) and slightly more often female (50 % (n = 4,251; 3,530 registrations missing) versus 45 % (n = 5,477). More detailed characteristics of our study population, classified by HbA<sub>1c</sub> profile and monitoring completeness, are presented in Table 1. Of patients who were incompletely monitored, information on physical exercise was most often missing, followed by smoking, BMI, LDL, and systolic blood pressure (Figure 2).

Compared to incompletely-monitored patients, fully-monitored patients had lower mean HbA<sub>1c</sub> levels in all three HbA<sub>1c</sub> profiles. In addition, fully-monitored patients had a longer duration of diabetes than incompletely-monitored patients.

The crude analysis showed that, compared with incompletely-monitored patients, the mean HbA<sub>1c</sub> of fully-monitored patients was significantly lower in the first profile (-1.95 [95% CI -2.41; -1.49] mmol/mol) (-0.18% [-0.22%; -0.14%]), second profile (-2.03 [95 % CI -3.41;-0.66] mmol/mol) (-0.19% [-0.31%; -0.06%]) and third profile (-1.53 [95 % CI -2.96;-0.10] mmol/mol)

1  
2  
3 (-0.14% [-0.27%; -0.01%]) (Table 2). Multilevel analyses with adjustment for diabetes  
4 duration, age and gender revealed similar significant associations in the first (-2.03 [95 % CI  
5 -2.53; -1.52] mmol/mol) (-0.19% (-0.23%; -0.14%)), second (-3.36 [95 % CI -5.28; -1.43]  
6 mmol/mol) (-0.31% [-0.48%; -0.13%]) and third profile (-1.89 [95 % CI -3.76; -0.01]  
7 mmol/mol) (-0.17% [-0.34%; 0.00%]). The magnitude of these associations did not  
8 significantly differ between the HbA<sub>1c</sub> profile groups (p=0.44 and p=0.35 for the second and  
9 third profile, respectively, compared with the first profile).  
10  
11  
12  
13  
14  
15  
16  
17  
18  
19  
20

## 21 4. Discussion

22  
23  
24 This study explored whether monitoring completeness of biomedical and lifestyle-related  
25 diabetes target indicators in a care group setting is associated with HbA<sub>1c</sub> level. In all HbA<sub>1c</sub>  
26 profile groups – defined based on patient age, intensity of medication treatment and disease  
27 duration – we found that fully-monitored patients had lower HbA<sub>1c</sub> levels than incompletely-  
28 monitored patients; the differences ranged from 0.17% (1.89 mmol/mol) to 0.31% (3.36  
29 mmol/mol), indicating that adequate diabetes monitoring of biomedical and lifestyle  
30 indicators in primary care is associated with better HbA<sub>1c</sub> levels. To our knowledge, this is  
31 the first study to analyse the association between systematic diabetes monitoring in primary  
32 care and HbA<sub>1c</sub> levels. Apart from one longitudinal Dutch study on structured primary  
33 diabetes care in a care group setting which reported a sharp decrease in the proportion of  
34 patients with a HbA<sub>1c</sub> level  $\geq$ 53 mmol/mol (24), research on absolute HbA<sub>1c</sub> differences is  
35 scarce and findings appear to be somewhat inconsistent (29-32). Therefore, caution is  
36 required when comparing our findings with any earlier studies. However, for each 1% (10.9  
37 mmol/mol) reduction in mean HbA<sub>1c</sub>, a significant decrease in health risk has been reported,  
38 ranging from 21% for any endpoint related to diabetes including deaths, to 14% for  
39 myocardial infarction, and 37% for microvascular complications (33). Further, our finding that  
40 registration of physical exercise was most often lacking, is in line with an earlier small-size  
41  
42  
43  
44  
45  
46  
47  
48  
49  
50  
51  
52  
53  
54  
55  
56  
57  
58  
59  
60

1  
2  
3 study in which only 19% of patients with type 2 diabetes reported 'being guided properly'  
4  
5 with regard to physical exercise (34).  
6  
7

8 Our finding that, compared with incomplete monitoring, full monitoring of patients is  
9  
10 associated with a lower HbA<sub>1c</sub> level might be explained by continuity of care in several ways.  
11  
12 First, if patients are monitored at least once a year, an increasing HbA<sub>1c</sub> level might be  
13  
14 noticed at an early stage, resulting in fast and adequate treatment. Second, periodic  
15  
16 monitoring and coaching of patients with regard to weight loss, smoking cessation and  
17  
18 physical exercise contributes to enduring lifestyle adaptation (11, 12), which may lead to  
19  
20 lower HbA<sub>1c</sub> levels (35).  
21  
22

23 Since fully-monitored patients with type 2 diabetes have significantly lower HbA<sub>1c</sub> levels, their  
24  
25 risk of any diabetes-related health complication is lower compared to incompletely-monitored  
26  
27 patients. Thus, in general, incomplete monitoring of a patient should be interpreted as an  
28  
29 important sign of diabetes-related health risks – especially since incomplete records might  
30  
31 not only be caused by no-show, but also by low patient motivation, missing of prescribed lab  
32  
33 tests and limited overall adherence to diabetes treatment. As reported by others (36), a  
34  
35 tailored approach based on data registry and adjusted to patient characteristics (e.g.  
36  
37 monitoring completeness), is recommended. This might encourage awareness in GP  
38  
39 practice regarding adequate diabetes management and might help GP's to overcome  
40  
41 barriers on full adoption of the care group monitoring approach. In addition, the present  
42  
43 findings might be relevant for other structured diabetes primary care settings which focus on  
44  
45 frequent monitoring and adequate registration of diabetes-related health outcomes, such as  
46  
47 the Comprehensive Primary Care Plus program in the USA (37).  
48  
49  
50

51 The present study is characterised by several strengths. First, in our view, an important  
52  
53 strength of this study is the design: although randomized clinical trials might help to eliminate  
54  
55 bias, adequate powering and generalizability are familiar problems (38), whereas  
56  
57 observational studies allow to include large study populations. For example, in this study, all  
58  
59  
60

1  
2  
3 patients participating in a structured primary diabetes care program were enrolled, thereby  
4 contributing to high representativeness of our study population. Second, generally, since our  
5 study design did not interfere with the daily routine of GP practices, we assume adequate  
6 reliability of our findings. Thus, the observational real-life setting in our study reflects the  
7 reality of diabetes monitoring and HbA<sub>1c</sub> levels in primary care. Our design is in line with  
8 other studies that also used a pragmatic approach to conduct diabetes related studies in  
9 primary care (39-41). Third, since patients were included if they participated for at least one  
10 year at the same GP practice, bias caused by intermediate moving or referral to hospital  
11 diabetes care was avoided - which contributes to the stability and, thus, the validity of our  
12 findings. Finally, conducting separate analyses for each HbA<sub>1c</sub> profile group allowed  
13 adjustment for the variety in the recommended HbA<sub>1c</sub> target values.  
14  
15

16  
17 Nevertheless, this study is also subject to some limitations that need to be mentioned. First,  
18 since no control group was included, no causal relation between monitoring completeness  
19 and HbA<sub>1c</sub> level can be proven. Second, a missing registration does not necessarily mean  
20 that the care has not been provided. For example, missings might be caused by technical  
21 problems, or lack of time for registration. Patients being considered erroneously as  
22 'incompletely monitored' might have underestimated the associations found, although we did  
23 correct our analyses for age, diabetes duration, gender and GP practice.  
24  
25

26  
27 For future research, it might be useful to analyse the context of diabetes target monitoring  
28 and explore whether the association that we found reflects a causal relationship between  
29 monitoring completeness and HbA<sub>1c</sub> level. In addition, from the GP perspective, examining  
30 potential barriers to complete monitoring, including potential benefits such as an increase of  
31 the proportion patients with HbA<sub>1c</sub> levels within recommended values, might provide keys to  
32 improvement of the monitoring process. To ameliorate the primary diabetes care of  
33 incompletely-monitored patients, exploration of their preferences and needs is suggested. In  
34 addition, an evaluation of financial costs and benefits of this care approach is recommended.  
35  
36  
37  
38  
39  
40  
41  
42  
43  
44  
45  
46  
47  
48  
49  
50  
51  
52  
53  
54  
55  
56  
57  
58  
59  
60

1  
2  
3 To summarize, in patients with type 2 diabetes within a care group setting, full monitoring of  
4 biomedical and lifestyle target indicators is associated with lower HbA<sub>1c</sub> levels compared with  
5 incomplete monitoring. These differences might be expected to have a considerable clinical  
6 impact in terms of diabetes-related risks. We recommend a systematic approach to  
7 analysing the needs of incompletely-monitored patient groups, and to adjust the structured  
8 care protocol for these subgroups in terms of population health management.  
9  
10  
11  
12  
13  
14  
15  
16  
17  
18  
19  
20  
21  
22  
23  
24  
25  
26  
27  
28  
29  
30  
31  
32  
33  
34  
35  
36  
37  
38  
39  
40  
41  
42  
43  
44  
45  
46  
47  
48  
49  
50  
51  
52  
53  
54  
55  
56  
57  
58  
59  
60

For peer review only

## Article Information

**Acknowledgments.** The authors thank the GPs and patients of the ELZHA care group for the use of their data for this study.

**Funding statement.** This research received no specific grant from any funding agency in the public, commercial or not-for-profit sectors.

**Duality of Interest.** No potential conflicts of interest relevant to this article were reported. All authors have completed the ICMJE uniform disclosure form at [www.icmje.org/coi\\_disclosure.pdf](http://www.icmje.org/coi_disclosure.pdf) and declare: no support from any organisation for the submitted work; no financial relationships with any organisations that might have an interest in the submitted work in the previous three years; no other relationships or activities that could appear to have influenced the submitted work.”

### Transparency Declaration

The lead author (the manuscript's guarantor) affirms that the manuscript is an honest, accurate, and transparent account of the study being reported; that no important aspects of the study have been omitted; and that any discrepancies from the study as planned (and, if relevant, registered) have been explained.

**Author Contributions.** SvB analysed data and wrote the manuscript. SR analysed data and reviewed the manuscript. MK reviewed and edited the manuscript. TB reviewed the manuscript. NC reviewed the manuscript and contributed to the discussion. MN is the guarantor of this work and, as such, had full access to all the data in the study and takes responsibility for the integrity of the data and the accuracy of the data analysis.

**Data sharing statement.** The data that support the findings of this study are available from the corresponding author on request.

### Licence

1  
2  
3 The Corresponding Author has the right to grant on behalf of all authors and does grant on  
4 behalf of all authors, an exclusive licence (or non exclusive for government employees) on a  
5 worldwide basis to the BMJ Publishing Group Ltd (“BMJ”), and its Licencees to permit this  
6 article (if accepted) to be published in The BMJ’s editions and any other BMJ products and  
7 to exploit all subsidiary rights, as set out in *our licence*.” “  
8  
9  
10  
11  
12  
13  
14  
15  
16  
17  
18  
19  
20  
21  
22  
23  
24  
25  
26  
27  
28  
29  
30  
31  
32  
33  
34  
35  
36  
37  
38  
39  
40  
41  
42  
43  
44  
45  
46  
47  
48  
49  
50  
51  
52  
53  
54  
55  
56  
57  
58  
59  
60

For peer review only

## References

1. Howells L, Musaddaq B, McKay AJ, Majeed A. Clinical impact of lifestyle interventions for the prevention of diabetes: an overview of systematic reviews. *BMJ Open*. 2016;6(12):e013806.
2. Fagard RH. Smoking amplifies cardiovascular risk in patients with hypertension and diabetes. *Diabetes Care*. 2009;32 Suppl 2:S429-31.
3. Qin R, Chen T, Lou Q, Yu D. Excess risk of mortality and cardiovascular events associated with smoking among patients with diabetes: meta-analysis of observational prospective studies. *Int J Cardiol*. 2013;167(2):342-50.
4. Gray N, Picone G, Sloan F, Yashkin A. Relation between BMI and diabetes mellitus and its complications among US older adults. *South Med J*. 2015;108(1):29-36.
5. Dempsey PC, Blankenship JM, Larsen RN, Sacre JW, Sethi P, Straznicky NE, et al. Interrupting prolonged sitting in type 2 diabetes: nocturnal persistence of improved glycaemic control. *Diabetologia*. 2017;60(3):499-507.
6. Babb S, Malarcher A, Schauer G, Asman K, Jamal A. Quitting Smoking Among Adults - United States, 2000-2015. *MMWR Morb Mortal Wkly Rep*. 2017;65(52):1457-64.
7. Twyman L, Bonevski B, Paul C, Bryant J. Perceived barriers to smoking cessation in selected vulnerable groups: a systematic review of the qualitative and quantitative literature. *BMJ Open*. 2014;4(12):e006414.
8. Papias EK. Health goal priming as a situated intervention tool: how to benefit from nonconscious motivational routes to health behaviour. *Health Psychol Rev*. 2016;10(4):408-24.
9. Arterburn DE, Bogart A, Sherwood NE, Sidney S, Coleman KJ, Haneuse S, et al. A multisite study of long-term remission and relapse of type 2 diabetes mellitus following gastric bypass. *Obes Surg*. 2013;23(1):93-102.
10. Hawkins J, Hollingworth W, Campbell R. Long-term smoking relapse: a study using the british household panel survey. *Nicotine Tob Res*. 2010;12(12):1228-35.
11. Pjanic, Muller R, Laimer M, Hagenbuch N, Laederach K, Stanga Z. Evaluation of a multiprofessional, nonsurgical obesity treatment program: which parameters indicated life style changes and weight loss? *J Eat Disord*. 2017;5:14.
12. Venditti EM, Wylie-Rosett J, Delahanty LM, Mele L, Hoskin MA, Edelstein SL, et al. Short and long-term lifestyle coaching approaches used to address diverse participant barriers to weight loss and physical activity adherence. *Int J Behav Nutr Phys Act*. 2014;11:16.
13. Rutten GEHM, DGW, Nijpels G, Houweling ST, Van de Laar FA, Bilo HJ, Holleman F, Burgers JS, Wiersma Tj, Janssen PGH. NHG-Standaard Diabetes mellitus type 2 (derde herziening). *Huisarts en Wetenschap* 2013;56(10):512-25.
14. Type 2 diabetes in adults: management. United Kingdom: National Institute for Health and Care Excellence; NICE guideline 2015.
15. Ekong G, Kavookjian J. Motivational interviewing and outcomes in adults with type 2 diabetes: A systematic review. *Patient Educ Couns*. 2016;99(6):944-52.
16. Rushforth B, McCrorie C, Glidewell L, Midgley E, Foy R. Barriers to effective management of type 2 diabetes in primary care: qualitative systematic review. *Br J Gen Pract*. 2016;66(643):e114-27.
17. Maier C, Aiken L., and Busse R. Nurses in advanced roles in primary care: Policy levers for implementation. Paris; 2017. Report No.: 98.
18. Mergenthal K, Beyer M, Gerlach FM, Guethlin C. Sharing Responsibilities within the General Practice Team - A Cross-Sectional Study of Task Delegation in Germany. *PLoS One*. 2016;11(6):e0157248.
19. Hefford M, Love T, Cumming J, Finlayson M, Raymont A. The financial impact of clinical task substitution between practice nurses and GPs in New Zealand primary care centres. *N Z Med J*. 2011;124(1342):59-65.



20. Ferrante JM, Shaw EK, Bayly JE, Howard J, Quest MN, Clark EC, et al. Barriers and Facilitators to Expanding Roles of Medical Assistants in Patient-Centered Medical Homes (PCMHs). *J Am Board Fam Med*. 2018;31(2):226-35.
21. McInnes S, Peters K, Bonney A, Halcomb E. An integrative review of facilitators and barriers influencing collaboration and teamwork between general practitioners and nurses working in general practice. *J Adv Nurs*. 2015;71(9):1973-85.
22. Dale SB, Ghosh A, Peikes DN, Day TJ, Yoon FB, Taylor EF, et al. Two-Year Costs and Quality in the Comprehensive Primary Care Initiative. *N Engl J Med*. 2016;374(24):2345-56.
23. Struijs JN, Van Til JT, Baan CA. Experimenteren met de keten-dbc diabetes: de eerste zichtbare effecten. Bilthoven: RIVM; 2009. p. 19-62.
24. Hendriks SH, van Hateren KJ, Groenier KH, Houweling ST, Maas AH, Kleefstra N, et al. Sex Differences in the Quality of Diabetes Care in the Netherlands (ZODIAC-45). *PLoS One*. 2015;10(12):e0145907.
25. Hoque DME, Kumari V, Hoque M, Ruseckaite R, Romero L, Evans SM. Impact of clinical registries on quality of patient care and clinical outcomes: A systematic review. *PLoS One*. 2017;12(9):e0183667.
26. Van Bruggen S, Kasteleyn MJ, Rauh SP, Bonten TN, Chavannes NH, Numans ME. A multidisciplinary Type 2 Diabetes care protocol within a primary care group leads to a higher proportion of fully-monitored patients (ELZHA cohort-1). Annual Meeting; Chicago (Illinois), United States: North American Primary Care Research Group; 2018.
27. Kadu MK, Stolee P. Facilitators and barriers of implementing the chronic care model in primary care: a systematic review. *BMC Fam Pract*. 2015;16:12.
28. Lacey RE, Sacker A, Bell S, Kumari M, Worts D, McDonough P, et al. Work-family life courses and BMI trajectories in three British birth cohorts. *Int J Obes (Lond)*. 2017;41(2):332-9.
29. Fuchs S, Henschke C, Blumel M, Busse R. Disease management programs for type 2 diabetes in Germany: a systematic literature review evaluating effectiveness. *Dtsch Arztebl Int*. 2014;111(26):453-63.
30. Gabbay RA, Lendel I, Saleem TM, Shaeffer G, Adelman AM, Mauger DT, et al. Nurse case management improves blood pressure, emotional distress and diabetes complication screening. *Diabetes Res Clin Pract*. 2006;71(1):28-35.
31. Kostev K, Rockel T, Jacob L. Impact of Disease Management Programs on HbA1c Values in Type 2 Diabetes Patients in Germany. *J Diabetes Sci Technol*. 2017;11(1):117-22.
32. Wiefarn S, Kostev K, Heumann C, Rettelbach A. [Effect of the Disease Management Program on HbA1c Value in Type 2 Diabetes Mellitus Patients: A Retrospective Comparison between Disease Management Programs and Standard Care]. *Dtsch Med Wochenschr*. 2017;142(21):e148-e55.
33. Stratton IM, Adler AI, Neil HA, Matthews DR, Manley SE, Cull CA, et al. Association of glycaemia with macrovascular and microvascular complications of type 2 diabetes (UKPDS 35): prospective observational study. *BMJ*. 2000;321(7258):405-12.
34. Stuij M, Elling A, Abma TA. Conflict between diabetes guidelines and experienced counselling in sports and physical activity. An exploratory study. *Eur J Public Health*. 2017;27(1):157-9.
35. Umpierre D, Ribeiro PA, Kramer CK, Leitao CB, Zucatti AT, Azevedo MJ, et al. Physical activity advice only or structured exercise training and association with HbA1c levels in type 2 diabetes: a systematic review and meta-analysis. *JAMA*. 2011;305(17):1790-9.
36. Aronson R, Orzech N, Ye C, Brown RE, Goldenberg R, Brown V. Specialist-Led Diabetes Registries and Prevalence of Poor Glycemic Control in Type 2 Diabetes: The Diabetes Registry Outcomes Project for A1C Reduction (DROP A1C). *Diabetes Care*. 2016;39(10):1711-7.
37. Sessums LL, McHugh SJ, Rajkumar R. Medicare's Vision for Advanced Primary Care: New Directions for Care Delivery and Payment. *JAMA*. 2016;315(24):2665-6.
38. Frakt AB. An observational study goes where randomized clinical trials have not. *JAMA*. 2015;313(11):1091-2.

- 1  
2  
3 39. Hippisley-Cox J, Coupland C. Diabetes treatments and risk of heart failure, cardiovascular  
4 disease, and all cause mortality: cohort study in primary care. *BMJ*. 2016;354:i3477.  
5 40. Price DB, Russell R, Mares R, Burden A, Skinner D, Mikkelsen H, et al. Metabolic Effects  
6 Associated with ICS in Patients with COPD and Comorbid Type 2 Diabetes: A Historical Matched  
7 Cohort Study. *PLoS One*. 2016;11(9):e0162903.  
8 41. Smits KPJ, Sidorenkov G, Navis G, Bouma M, Meulepas MA, Bilo HJG, et al. Prescribing  
9 Quality and Prediction of Clinical Outcomes in Patients With Type 2 Diabetes: A Prospective Cohort  
10 Study. *Diabetes Care*. 2017;40(7):e83-e4.  
11  
12  
13  
14  
15  
16  
17  
18  
19  
20  
21  
22  
23  
24  
25  
26  
27  
28  
29  
30  
31  
32  
33  
34  
35  
36  
37  
38  
39  
40  
41  
42  
43  
44  
45  
46  
47  
48  
49  
50  
51  
52  
53  
54  
55  
56  
57  
58  
59  
60

For peer review only

## Figures and tables

Figure 1. Flowchart of patient inclusion.

Pts = patients

Figure 2. Overview of registered indicators in incompletely monitored patients within Hba1c profile

HbA1c: Hemoglobin A1c

For peer review only

Table 1. Characteristics of the study population: classified by HbA<sub>1c</sub> profile and monitoring completeness.

|                                  |       | <b>HbA<sub>1c</sub> profile 1<sup>1</sup></b> |                 | <b>HbA<sub>1c</sub> profile 2<sup>2</sup></b> |                 | <b>HbA<sub>1c</sub> profile 3<sup>3</sup></b> |                 |
|----------------------------------|-------|-----------------------------------------------|-----------------|-----------------------------------------------|-----------------|-----------------------------------------------|-----------------|
|                                  |       | <i>Target HbA<sub>1c</sub>:</i>               |                 | <i>Target HbA<sub>1c</sub>:</i>               |                 | <i>HbA<sub>1c</sub>: 64 mmol/mol</i>          |                 |
|                                  |       | <i>53 mmol/mol (7.0%)</i>                     |                 | <i>58 mmol/mol (7.5%)</i>                     |                 | <i>(8.0%)</i>                                 |                 |
|                                  |       | <b>Incomplete</b>                             | <b>Complete</b> | <b>Incomplete</b>                             | <b>Complete</b> | <b>Incomplete</b>                             | <b>Complete</b> |
|                                  |       | n =3,345                                      | n =6,794        | n = 396                                       | n = 656         | n = 217                                       | n = 687         |
| HbA <sub>1c</sub> level:         | mmol/ | 53.51                                         | 51.56           | 55.91                                         | 53.87           | 55.12                                         | 53.60           |
| mean [SD] <sup>4</sup>           | mol   | (12.31)                                       | (10.51)         | (11.66)                                       | (10.60)         | (10.57)                                       | (8.98)          |
|                                  | %     | 7.05 (1.13)                                   | 6.87 (0.96)     | 7.27 (1.07)                                   | 7.08 (0.97)     | 7.19 (0.97)                                   | 7.06 (0.82)     |
| Diabetes duration,               |       | 3 [3 – 8]                                     | 7 [4 – 10]      | 3 [3 – 7]                                     | 7 [4 – 8]       | 13 [11 – 16]                                  | 13 [11 – 15]    |
| years: median [IQR] <sup>5</sup> |       |                                               |                 |                                               |                 |                                               |                 |
| Age (years): median              |       | 61 [54 – 67]                                  | 62 [55 – 68]    | 74 [72 – 76]                                  | 74 [71 – 76]    | 74 [72 – 77]                                  | 74 [72 – 76]    |
| [IQR]                            |       |                                               |                 |                                               |                 |                                               |                 |
| Gender: % female (n)             |       | 44 (1,465)                                    | 46 (3,106)      | 46 (183)                                      | 45 (297)        | 51(110)                                       | 46 (316)        |

1) Profile 1: patients aged <70 years, and older patients with a mild treatment regime (only metformin monotherapy prescription)

2) Profile 2: patients aged ≥70 years who need more intensive treatment and diagnosed with diabetes <10 years ago

3) Profile 3: patients aged ≥70 years who need more intensive treatment and diagnosed with diabetes ≥10 years ago

4) SD = standard deviation

5) IQR = interquartile range

Table 2. Multilevel analyses evaluating the HbA<sub>1c</sub> difference of fully-monitored patients compared to incompletely monitored patients, stratified for HbA<sub>1c</sub> profile.

|                 |       | <b>Profile 1</b> |               |                | <b>Profile 2</b> |               |                | <b>Profile 3</b> |               |                |
|-----------------|-------|------------------|---------------|----------------|------------------|---------------|----------------|------------------|---------------|----------------|
|                 |       | <b>B</b>         | <b>95% CI</b> | <b>p-value</b> | <b>B</b>         | <b>95% CI</b> | <b>p-value</b> | <b>B</b>         | <b>95% CI</b> | <b>p-value</b> |
| Model           | mmol  | -1.95            | -2.41,-1.49   | <0.001         | -2.03            | -3.41,-0.66   | 0.004          | -1.53            | -2.96,-0.10   | 0.037          |
| 1 <sup>a)</sup> | / mol |                  |               |                |                  |               |                |                  |               |                |
|                 | %     | -0.18            | -0.22; -0.14  |                | -0.19            | -0.31; -0.06  |                | -0.14            | -0.27; -0.01  |                |
| Model           | mmol  | -2.03            | -2.53, -1.52  | <0.001         | -3.36            | -5.28, -1.43  | 0.001          | -1.89            | -3.76, -0.01  | 0.049          |
| 2 <sup>b)</sup> | / mol |                  |               |                |                  |               |                |                  |               |                |
|                 | %     | -0.19            | -0.23; -0.14  |                | -0.31            | -0.48; -0.13  |                | -0.17            | -0.34; 0.00   |                |

a) Crude analysis

b) Multilevel analysis adjusted for age, diabetes duration and gender

Flowchart incluse

Figure 1. Flowchart of patient inclusion

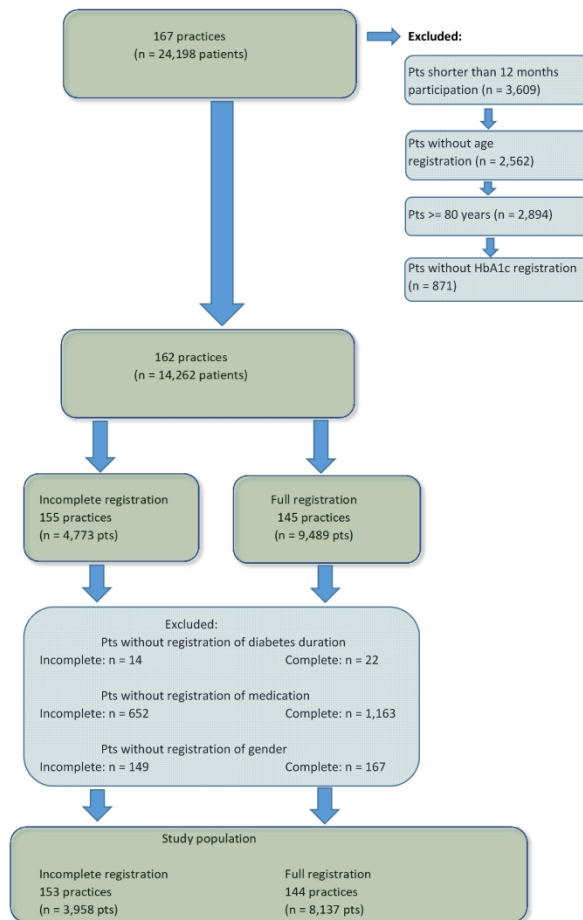

1  
2  
3  
4  
5  
6  
7  
8  
9  
10  
11  
12  
13  
14  
15  
16  
17  
18  
19  
20  
21  
22  
23  
24  
25  
26  
27  
28  
29  
30  
31  
32  
33  
34  
35  
36  
37  
38  
39  
40  
41  
42  
43  
44  
45  
46  
47  
48  
49  
50  
51  
52  
53  
54  
55  
56  
57  
58  
59  
60

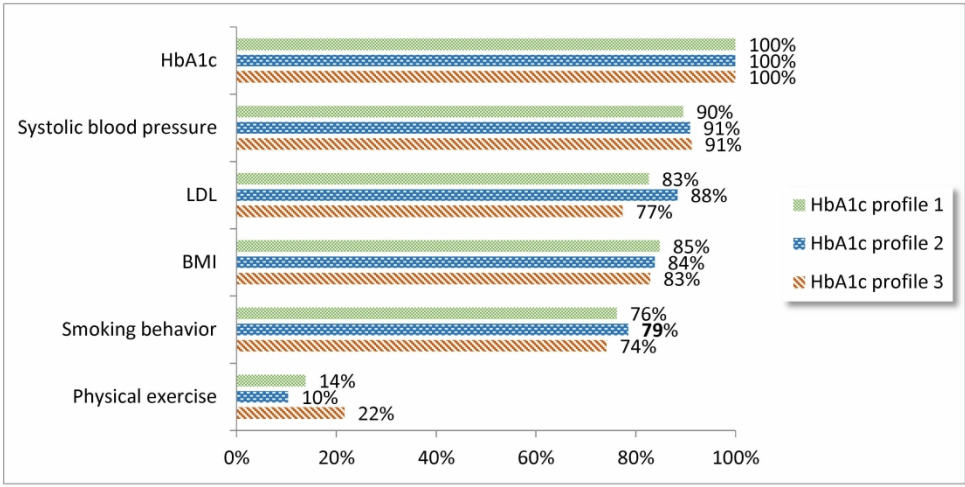

# Association between full monitoring of biomedical and lifestyle target indicators and HbA1c level in primary type 2 diabetes care: an observational cohort study (ELZHA-cohort 1)

## Supplementary file

Since missing data on medication prescription might reflect absence of medication treatment but also technical errors, all patients without medication registration were excluded. As a result, in the final analyses, T2DM patients with a lower HbA1c level and subsequently no medication prescription, were excluded.

*Table 1. Characteristics of study population and excluded patients.*

|                                                     |            | Included patients | Excluded patients (n = 12,103) |                       |
|-----------------------------------------------------|------------|-------------------|--------------------------------|-----------------------|
|                                                     |            | n = 12,095        | Outcomes                       | Missing registrations |
| HbA1c: mean (SD)                                    | Mmol / mol | 52.55 (11.07)     | 50.32 (12.8)                   | 7,535                 |
|                                                     | %          | 6.95 (3.16)       | 6.76 (3.32)                    |                       |
| Diabetes duration, years: median [IQR] <sup>1</sup> |            | 6 [3 -10]         | 5 [3 – 9]                      | 63                    |
| Age (years): median [IQR] <sup>2</sup>              |            | 64 [56 – 71]      | 71 [60 – 82]                   | 2,917                 |
| Gender: % female (n)                                |            | 45 (5.477)        | 50 (4.251)                     | 3,530                 |

<sup>1)</sup> SD = standard deviation

<sup>2)</sup> IQR = interquartile range

1  
2  
3  
4  
5  
6  
7  
8  
9  
10  
11  
12  
13  
14  
15  
16  
17  
18  
19  
20  
21  
22  
23  
24  
25  
26  
27  
28  
29  
30  
31  
32  
33  
34  
35  
36  
37  
38  
39  
40  
41  
42  
43  
44  
45  
46  
47  
48  
49  
50  
51  
52  
53  
54  
55  
56  
57  
58  
59  
60

## STROBE Statement—checklist of items that should be included in reports of observational studies

|                              | Item No | Recommendation                                                                                                                                                                                                                                                                                                                                                                                                                                                         | Page number |
|------------------------------|---------|------------------------------------------------------------------------------------------------------------------------------------------------------------------------------------------------------------------------------------------------------------------------------------------------------------------------------------------------------------------------------------------------------------------------------------------------------------------------|-------------|
| <b>Title and abstract</b>    | 1       | (a) Indicate the study's design with a commonly used term in the title or the abstract                                                                                                                                                                                                                                                                                                                                                                                 | 1, 2        |
|                              |         | (b) Provide in the abstract an informative and balanced summary of what was done and what was found                                                                                                                                                                                                                                                                                                                                                                    | 2, 3        |
| <b>Introduction</b>          |         |                                                                                                                                                                                                                                                                                                                                                                                                                                                                        |             |
| Background/rationale         | 2       | Explain the scientific background and rationale for the investigation being reported                                                                                                                                                                                                                                                                                                                                                                                   | 4, 5        |
| Objectives                   | 3       | State specific objectives, including any prespecified hypotheses                                                                                                                                                                                                                                                                                                                                                                                                       | 5, 6        |
| <b>Methods</b>               |         |                                                                                                                                                                                                                                                                                                                                                                                                                                                                        |             |
| Study design                 | 4       | Present key elements of study design early in the paper                                                                                                                                                                                                                                                                                                                                                                                                                | 6           |
| Setting                      | 5       | Describe the setting, locations, and relevant dates, including periods of recruitment, exposure, follow-up, and data collection                                                                                                                                                                                                                                                                                                                                        | 6, 7        |
| Participants                 | 6       | (a) <i>Cohort study</i> —Give the eligibility criteria, and the sources and methods of selection of participants. Describe methods of follow-up<br><i>Case-control study</i> —Give the eligibility criteria, and the sources and methods of case ascertainment and control selection. Give the rationale for the choice of cases and controls<br><i>Cross-sectional study</i> —Give the eligibility criteria, and the sources and methods of selection of participants | 6, 7        |
|                              |         | (b) <i>Cohort study</i> —For matched studies, give matching criteria and number of exposed and unexposed<br><i>Case-control study</i> —For matched studies, give matching criteria and the number of controls per case                                                                                                                                                                                                                                                 | 7           |
| Variables                    | 7       | Clearly define all outcomes, exposures, predictors, potential confounders, and effect modifiers. Give diagnostic criteria, if applicable                                                                                                                                                                                                                                                                                                                               | 7, 8        |
| Data sources/<br>measurement | 8*      | For each variable of interest, give sources of data and details of methods of assessment (measurement). Describe comparability of assessment methods if there is more than one group                                                                                                                                                                                                                                                                                   | 7, 8        |
| Bias                         | 9       | Describe any efforts to address potential sources of bias                                                                                                                                                                                                                                                                                                                                                                                                              | 7, 8        |
| Study size                   | 10      | Explain how the study size was arrived at                                                                                                                                                                                                                                                                                                                                                                                                                              | 7           |
| Quantitative variables       | 11      | Explain how quantitative variables were handled in the analyses. If applicable, describe which groupings were chosen and why                                                                                                                                                                                                                                                                                                                                           | 7, 8        |
| Statistical methods          | 12      | (a) Describe all statistical methods, including those used to control for confounding                                                                                                                                                                                                                                                                                                                                                                                  | 8 - 9       |
|                              |         | (b) Describe any methods used to examine subgroups and interactions                                                                                                                                                                                                                                                                                                                                                                                                    | 8 - 9       |
|                              |         | (c) Explain how missing data were addressed                                                                                                                                                                                                                                                                                                                                                                                                                            | 6           |
|                              |         | (d) <i>Cohort study</i> —If applicable, explain how loss to follow-up was addressed<br><i>Case-control study</i> —If applicable, explain how matching of cases and controls was addressed<br><i>Cross-sectional study</i> —If applicable, describe analytical methods taking account of sampling strategy                                                                                                                                                              |             |
|                              |         | (e) Describe any sensitivity analyses                                                                                                                                                                                                                                                                                                                                                                                                                                  |             |

Continued on next page



| <b>Results</b>           |     |                                                                                                                                                                                                              |         |
|--------------------------|-----|--------------------------------------------------------------------------------------------------------------------------------------------------------------------------------------------------------------|---------|
| Participants             | 13* | (a) Report numbers of individuals at each stage of study—eg numbers potentially eligible, examined for eligibility, confirmed eligible, included in the study, completing follow-up, and analysed            | 10      |
|                          |     | (b) Give reasons for non-participation at each stage                                                                                                                                                         | 10      |
|                          |     | (c) Consider use of a flow diagram                                                                                                                                                                           | Present |
| Descriptive data         | 14* | (a) Give characteristics of study participants (eg demographic, clinical, social) and information on exposures and potential confounders                                                                     | 10      |
|                          |     | (b) Indicate number of participants with missing data for each variable of interest                                                                                                                          |         |
|                          |     | (c) <i>Cohort study</i> —Summarise follow-up time (eg, average and total amount)                                                                                                                             |         |
| Outcome data             | 15* | <i>Cohort study</i> —Report numbers of outcome events or summary measures over time                                                                                                                          | 10      |
|                          |     | <i>Case-control study</i> —Report numbers in each exposure category, or summary measures of exposure                                                                                                         |         |
|                          |     | <i>Cross-sectional study</i> —Report numbers of outcome events or summary measures                                                                                                                           |         |
| Main results             | 16  | (a) Give unadjusted estimates and, if applicable, confounder-adjusted estimates and their precision (eg, 95% confidence interval). Make clear which confounders were adjusted for and why they were included | 10, 11  |
|                          |     | (b) Report category boundaries when continuous variables were categorized                                                                                                                                    |         |
|                          |     | (c) If relevant, consider translating estimates of relative risk into absolute risk for a meaningful time period                                                                                             |         |
| Other analyses           | 17  | Report other analyses done—eg analyses of subgroups and interactions, and sensitivity analyses                                                                                                               | 11      |
| <b>Discussion</b>        |     |                                                                                                                                                                                                              |         |
| Key results              | 18  | Summarise key results with reference to study objectives                                                                                                                                                     | 11, 12  |
| Limitations              | 19  | Discuss limitations of the study, taking into account sources of potential bias or imprecision. Discuss both direction and magnitude of any potential bias                                                   | 13      |
| Interpretation           | 20  | Give a cautious overall interpretation of results considering objectives, limitations, multiplicity of analyses, results from similar studies, and other relevant evidence                                   | 13      |
| Generalisability         | 21  | Discuss the generalisability (external validity) of the study results                                                                                                                                        | 14      |
| <b>Other information</b> |     |                                                                                                                                                                                                              |         |
| Funding                  | 22  | Give the source of funding and the role of the funders for the present study and, if applicable, for the original study on which the present article is based                                                |         |

\*Give information separately for cases and controls in case-control studies and, if applicable, for exposed and unexposed groups in cohort and cross-sectional studies.

**Note:** An Explanation and Elaboration article discusses each checklist item and gives methodological background and published examples of transparent reporting. The STROBE checklist is best used in conjunction with this article (freely available on the Web sites of PLoS Medicine at <http://www.plosmedicine.org/>, Annals of Internal Medicine at <http://www.annals.org/>, and Epidemiology at <http://www.epidem.com/>). Information on the STROBE Initiative is available at [www.strobe-statement.org](http://www.strobe-statement.org).
