# Supplementary material for: Association between full monitoring of biomedical and lifestyle target indicators and HbA1c level in primary type 2 diabetes care: an observational cohort study (ELZHA-cohort 1)
Source: PubMed Central journal article supplement — BMJ Open. 2019 Mar 13;9(3):e027208. doi: 10.1136/bmjopen-2018-027208 (PMC6429872; doi:10.1136/bmjopen-2018-027208), 2019-03-13
Supplement: bmjopen-2018-027208supp001.pdf [file bmjopen-2018-027208supp001.pdf]

# Association between full monitoring of biomedical and lifestyle target indicators and HbA1c level in primary type 2 diabetes care: an observational cohort study (ELZHA-cohort 1)

## Supplementary file

Since missing data on medication prescription might reflect absence of medication treatment but also technical errors, all patients without medication registration were excluded. As a result, in the final analyses, T2DM patients with a lower HbA1c level and subsequently no medication prescription, were excluded.

*Table 1. Characteristics of study population and excluded patients.*

|                                                     |            | <b>Included patients</b> | <b>Excluded patients (n = 12,103)</b> |                              |
|-----------------------------------------------------|------------|--------------------------|---------------------------------------|------------------------------|
|                                                     |            | <b>n = 12,095</b>        | <b>Outcomes</b>                       | <b>Missing registrations</b> |
| HbA1c: mean (SD)                                    | Mmol / mol | 52.55 (11.07)            | 50.32 (12.8)                          | 7,535                        |
|                                                     | %          | 6.95 (3.16)              | 6.76 (3.32)                           |                              |
| Diabetes duration, years: median [IQR] <sup>1</sup> |            | 6 [3 -10]                | 5 [3 – 9]                             | 63                           |
| Age (years): median [IQR] <sup>2</sup>              |            | 64 [56 – 71]             | 71 [60 – 82]                          | 2,917                        |
| Gender: % female (n)                                |            | 45 (5.477)               | 50 (4.251)                            | 3,530                        |

<sup>1)</sup> SD = standard deviation

<sup>2)</sup> IQR = interquartile range
